# Supplementary material
Source: MDPI journal article supplement (https://www.mdpi.com/2075-163X/12/12/1555)
Supplement: s1 [file s1]

Archive with 8 entries (8 files):
- Figure S1.png
- Figure S2.png
- Figure S3.png
- Figure S4.png
- Figure S5.png
- Figure S6.png
- Figures-Supplementary Materials.pdf
- Table S1-The individual silica particle data for each sample.xlsx
