# Supplementary material
Source: MDPI journal article supplement (https://www.mdpi.com/2075-163X/12/12/1555)
Supplement: s1 [file s1 › Table S1-The individual silica particle data for each sample.xlsx]

## Sheet: Table S1
Sample name	Mine region	Mine no	Sampling location	Particle length (nm)	Particle loading density from supramicron analysis (particles/µm2)	Si/(Al+Si) at 20kV	Si/(Al+Si) at 5kV	Si/(Si+Al) ratio difference at 20 and 5kVs
C-10-F-PC167	CA	10	F	1337.15	0.00570649	0.976694	0.843519	0.133175
C-10-F-PC167	CA	10	F	3558.43	0.00570649	0.892036	0.671259	0.220778
C-10-F-PC167	CA	10	F	1530.81	0.00570649	0.951825	0.899923	0.051902
C-10-F-PC167	CA	10	F	2850.52	0.00570649	0.884619	0.65837	0.226249
C-10-F-PC167	CA	10	F	538.214	0.00570649	0.925436	0.893124	0.032312
C-10-F-PC167	CA	10	F	2191.96	0.00570649	0.843241	0.784075	0.0591661
C-10-F-PC167	CA	10	F	1246.62	0.00570649	0.924242	0.89935	0.0248918
C-10-F-PC167	CA	10	F	1860.75	0.00570649	0.869255	0.663758	0.205497
C-10-F-PC167	CA	10	F	2220.67	0.00570649	0.959569	0.958086	0.00148331
C-10-F-PC167	CA	10	F	1708.94	0.00570649	0.872231	0.922166	-0.0499346
C-10-F-PC167	CA	10	F	1858.49	0.00570649	0.976556	0.957903	0.018653
C-10-F-PC167	CA	10	F	1221.18	0.00570649	0.962504	0.981222	-0.0187185
C-10-F-PC167	CA	10	F	1755.71	0.00570649	0.975297	0.903088	0.0722088
C-10-R-PC169	CA	10	R	538.203	0.00914775	0.907754	0.932962	-0.0252079
C-10-R-PC169	CA	10	R	1031	0.00914775	0.92413	0.812563	0.111567
C-10-R-PC169	CA	10	R	999.9	0.00914775	0.853176	0.874588	-0.0214118
C-10-R-PC169	CA	10	R	1063.99	0.00914775	0.928922	0.838026	0.0908963
C-10-R-PC169	CA	10	R	600	0.00914775	0.966197	0.913046	0.053151
C-10-R-PC169	CA	10	R	884.6	0.00914775	0.973719	0.945194	0.0285245
C-10-R-PC169	CA	10	R	695.169	0.00914775	0.806835	0.861131	-0.054296
C-10-R-PC169	CA	10	R	1515	0.00914775	0.919646	0.880285	0.0393615
C-10-R-PC169	CA	10	R	898	0.00914775	0.950439	0.882632	0.0678077
C-10-R-PC169	CA	10	R	1331	0.00914775	0.951137	0.89551	0.0556273
C-10-R-PC169	CA	10	R	680	0.00914775	0.971719	0.896139	0.0755803
C-10-R-PC169	CA	10	R	3535.21	0.00914775	0.948296	0.903	0.0452962
C-10-R-PC169	CA	10	R	2385.18	0.00914775	0.946804	0.886379	0.0604254
C-10-R-PC169	CA	10	R	1054.12	0.00914775	0.98083	0.94309	0.03774
C-10-R-PC169	CA	10	R	1386.81	0.00914775	0.843092	0.6518	0.191292
C-10-R-PC169	CA	10	R	2356.61	0.00914775	0.907584	0.81178	0.0958038
C-10-R-PC169	CA	10	R	1664.44	0.00914775	0.944111	0.778743	0.165367
C-10-R-PC169	CA	10	R	1775.22	0.00914775	0.984693	0.999503	-0.01481
C-10-R-PC169	CA	10	R	1283.45	0.00914775	0.990492	0.986313	0.00417988
C-10-R-PC169	CA	10	R	1696.68	0.00914775	0.967585	0.91059	0.0569957
C-10-R-PC169	CA	10	R	1769.98	0.00914775	0.92975	0.747974	0.181776
C-10-R-PC169	CA	10	R	508.712	0.00914775	0.937951	0.943367	-0.00541544
C-10-R-PC169	CA	10	R	789.17	0.00914775	0.902417	0.872943	0.0294747
C-10-R-PC169	CA	10	R	661.409	0.00914775	0.928459	0.954465	-0.0260053
C-10-R-PC169	CA	10	R	548	0.00914775	0.887269	0.916201	-0.0289315
C-10-R-PC169	CA	10	R	559	0.00914775	0.996885	0.995402	0.00148255
C-10-R-PC169	CA	10	R	599.568	0.00914775	0.922544	0.879945	0.0425991
C-10-R-PC169	CA	10	R	804.377	0.00914775	0.983328	0.964195	0.0191326
C-10-R-PC169	CA	10	R	527.079	0.00914775	0.945539	0.906309	0.0392295
C-10-R-PC169	CA	10	R	3584.52	0.00914775	0.886703	0.714185	0.172518
C-10-R-PC169	CA	10	R	995.956	0.00914775	0.893039	0.842559	0.0504797
C-10-R-PC169	CA	10	R	1508.29	0.00914775	0.927841	0.918267	0.00957347
C-10-R-PC169	CA	10	R	1942.25	0.00914775	0.939387	0.699248	0.240139
C-10-R-PC169	CA	10	R	1516.66	0.00914775	0.995075	0.992596	0.00247869
C-10-R-PC169	CA	10	R	1414.67	0.00914775	0.992845	1	-0.00715477
C-10-R-PC169	CA	10	R	1017.39	0.00914775	0.909362	0.944023	-0.0346609
C-10-R-PC169	CA	10	R	2460.03	0.00914775	0.742532	0.646528	0.0960039
C-10-R-PC169	CA	10	R	1007.94	0.00914775	0.980641	0.907882	0.0727598
C-10-R-PC169	CA	10	R	527	0.00914775	0.914334	0.831706	0.0826285
C-10-R-PC169	CA	10	R	765	0.00914775	0.906504	0.796346	0.110158
C-10-R-PC169	CA	10	R	918.605	0.00914775	0.89281	0.8662	0.0266103
C-10-R-PC169	CA	10	R	860.61	0.00914775	0.712518	0.556209	0.156309
C-10-R-PC169	CA	10	R	918.605	0.00914775	0.841792	0.818359	0.0234338
C-10-R-PC169	CA	10	R	1116.82	0.00914775	0.976368	0.952451	0.023917
C-10-R-PC169	CA	10	R	1664.44	0.00914775	0.953939	0.841657	0.112282
C-10-B-PC170	CA	10	B	1719.83	0.0315501	0.869705	0.627215	0.24249
C-10-B-PC170	CA	10	B	538.203	0.0315501	0.99603	0.961054	0.0349756
C-10-B-PC170	CA	10	B	932.609	0.0315501	0.851894	0.779773	0.0721215
C-10-B-PC170	CA	10	B	1074	0.0315501	0.938815	0.707419	0.231396
C-10-B-PC170	CA	10	B	2552.05	0.0315501	0.977045	0.950069	0.0269763
C-10-B-PC170	CA	10	B	893.498	0.0315501	0.763462	0.678023	0.0854391
C-10-B-PC170	CA	10	B	1736.81	0.0315501	0.934681	0.936954	-0.00227261
C-10-B-PC170	CA	10	B	2777.03	0.0315501	0.835336	0.694676	0.14066
C-10-B-PC170	CA	10	B	4324.63	0.0315501	0.975137	0.979076	-0.00393876
C-10-B-PC170	CA	10	B	678.261	0.0315501	0.709242	0.729016	-0.0197741
C-10-B-PC170	CA	10	B	861.237	0.0315501	0.873171	0.733943	0.139229
C-10-B-PC170	CA	10	B	1157.39	0.0315501	0.817036	0.812397	0.00463911
C-10-B-PC170	CA	10	B	1969.6	0.0315501	0.970792	0.927458	0.0433342
C-10-B-PC170	CA	10	B	1636.42	0.0315501	0.854085	0.821686	0.032399
C-10-B-PC170	CA	10	B	1068	0.0315501	0.921727	0.735355	0.186373
C-10-B-PC170	CA	10	B	1036	0.0315501	0.81459	0.736492	0.0780974
C-10-B-PC170	CA	10	B	1622	0.0315501	0.929883	0.957529	-0.0276464
C-10-B-PC170	CA	10	B	639.577	0.0315501	0.966526	0.738894	0.227631
C-10-B-PC170	CA	10	B	508.696	0.0315501	0.901712	0.886162	0.0155497
C-10-B-PC170	CA	10	B	582.455	0.0315501	0.767212	0.882015	-0.114803
C-10-B-PC170	CA	10	B	1369.82	0.0315501	0.956503	0.959464	-0.0029608
C-10-B-PC170	CA	10	B	2952	0.0315501	0.8401	0.790821	0.0492788
C-10-B-PC170	CA	10	B	582.255	0.0315501	0.863961	0.855947	0.00801443
C-10-B-PC170	CA	10	B	1830	0.0315501	0.90077	0.793613	0.107157
C-10-B-PC170	CA	10	B	1598.26	0.0315501	0.844408	0.668424	0.175984
C-10-F-PC172	CA	10	F	2552.16	0.0307908	0.883386	0.719895	0.163491
C-10-F-PC172	CA	10	F	861.274	0.0307908	0.8552	0.838746	0.0164535
C-10-F-PC172	CA	10	F	2221.38	0.0307908	0.933175	0.884277	0.0488979
C-10-F-PC172	CA	10	F	2221.38	0.0307908	0.856767	0.741	0.115768
C-10-F-PC172	CA	10	F	2221.38	0.0307908	0.969234	0.952572	0.0166629
C-10-F-PC172	CA	10	F	1685.9	0.0307908	0.930129	0.917167	0.0129618
C-10-F-PC172	CA	10	F	1285.53	0.0307908	0.881125	0.741767	0.139358
C-10-F-PC172	CA	10	F	4622.44	0.0307908	0.930538	0.855321	0.0752173
C-10-F-PC172	CA	10	F	1640.65	0.0307908	0.947301	0.85131	0.0959902
C-10-F-PC172	CA	10	F	2002.23	0.0307908	0.906552	0.778361	0.128191
C-10-F-PC172	CA	10	F	1608.31	0.0307908	0.931291	0.876961	0.0543309
C-10-F-PC172	CA	10	F	1306.02	0.0307908	0.838037	0.651394	0.186643
C-10-F-PC172	CA	10	F	2401.89	0.0307908	0.901455	0.769697	0.131758
C-10-F-PC172	CA	10	F	1308.16	0.0307908	0.942487	0.91554	0.0269469
C-10-F-PC172	CA	10	F	1415.17	0.0307908	0.945702	0.88246	0.063242
C-10-F-PC172	CA	10	F	1415.17	0.0307908	0.782195	0.776758	0.00543783
C-10-F-PC172	CA	10	F	1982.17	0.0307908	0.807677	0.542716	0.264962
C-10-F-PC172	CA	10	F	2592.81	0.0307908	0.91241	0.724064	0.188345
C-10-F-PC172	CA	10	F	2944.88	0.0307908	0.821014	0.904346	-0.083332
C-10-F-PC172	CA	10	F	2655.66	0.0307908	0.960792	0.905677	0.0551151
C-10-F-PC172	CA	10	F	1271.75	0.0307908	0.925691	0.857783	0.0679078
C-10-F-PC172	CA	10	F	2450.45	0.0307908	0.893799	0.863602	0.0301971
C-10-B-PC173	CA	10	B	956.112	0.0514847	0.937849	0.888015	0.0498343
C-10-B-PC173	CA	10	B	748.964	0.0514847	0.746251	0.749375	-0.0031241
C-10-B-PC173	CA	10	B	538.203	0.0514847	0.872658	0.887122	-0.0144646
C-10-B-PC173	CA	10	B	1916.85	0.0514847	0.880414	0.72365	0.156764
C-10-B-PC173	CA	10	B	3472.17	0.0514847	0.899632	0.967858	-0.068226
C-10-B-PC173	CA	10	B	1061.09	0.0514847	0.898323	0.775837	0.122486
C-10-B-PC173	CA	10	B	796	0.0514847	0.920482	0.941502	-0.0210203
C-10-B-PC173	CA	10	B	770	0.0514847	0.938951	0.960119	-0.0211678
C-10-B-PC173	CA	10	B	602	0.0514847	0.939384	0.954121	-0.0147376
C-10-B-PC173	CA	10	B	1016.24	0.0514847	0.961602	0.965486	-0.00388338
C-10-B-PC173	CA	10	B	2592.43	0.0514847	0.969952	0.966102	0.00384912
C-10-B-PC173	CA	10	B	756.646	0.0514847	0.917326	0.925274	-0.00794802
C-10-B-PC173	CA	10	B	1084.9	0.0514847	0.943189	0.894073	0.0491157
C-10-B-PC173	CA	10	B	4331.57	0.0514847	0.924784	0.970701	-0.045917
C-10-I-PC174	CA	10	I	2707.45	0.0013146	0.993622	0.991829	0.00179265
C-10-I-PC174	CA	10	I	981.52	0.0013146	0.836804	0.859765	-0.0229615
C-10-I-PC174	CA	10	I	1479.51	0.0013146	0.995882	0.992019	0.00386295
C-10-I-PC174	CA	10	I	2687.64	0.0013146	0.946727	0.698274	0.248453
C-10-I-PC174	CA	10	I	527	0.0013146	0.983283	0.976954	0.00632953
C-10-I-PC174	CA	10	I	1011	0.0013146	0.92941	0.930336	-0.000926636
C-10-I-PC174	CA	10	I	2156.99	0.0013146	0.966729	0.964209	0.00252005
C-10-I-PC174	CA	10	I	1858.3	0.0013146	0.981139	0.977393	0.00374598
C-10-I-PC174	CA	10	I	1871.5	0.0013146	0.996552	0.991263	0.00528892
C-10-I-PC174	CA	10	I	3234.66	0.0013146	0.970152	0.982489	-0.0123376
C-10-I-PC174	CA	10	I	3693.72	0.0013146	0.995566	0.975486	0.0200797
C-10-I-PC174	CA	10	I	1793.49	0.0013146	0.999262	0.990387	0.00887501
C-10-I-PC174	CA	10	I	3240.76	0.0013146	0.987996	0.9652	0.0227965
C-10-I-PC174	CA	10	I	2882.75	0.0013146	0.971755	0.973573	-0.00181721
C-10-I-PC174	CA	10	I	1362.25	0.0013146	0.937989	0.971343	-0.0333532
C-10-I-PC174	CA	10	I	1922.1	0.0013146	0.996566	0.985624	0.0109415
C-10-I-PC174	CA	10	I	1000.15	0.0013146	0.953415	0.928174	0.0252411
C-10-I-PC174	CA	10	I	721.111	0.0013146	0.992593	0.961399	0.0311941
C-10-I-PC174	CA	10	I	1570.65	0.0013146	0.964526	0.925993	0.0385332
C-10-I-PC174	CA	10	I	1759.73	0.0013146	0.969111	0.923695	0.0454156
C-10-I-PC174	CA	10	I	1607.51	0.0013146	0.812363	0.94269	-0.130326
C-10-I-PC174	CA	10	I	1246.62	0.0013146	0.956167	0.940126	0.0160409
C-10-I-PC174	CA	10	I	582.455	0.0013146	0.923583	0.857892	0.065691
C-10-I-PC174	CA	10	I	863.838	0.0013146	0.705259	0.81869	-0.11343
C-10-I-PC174	CA	10	I	1570.65	0.0013146	0.882876	0.784578	0.0982986
C-10-I-PC174	CA	10	I	3816.03	0.0013146	0.995187	0.996349	-0.00116171
C-10-I-PC174	CA	10	I	1215.72	0.0013146	0.930296	0.79637	0.133926
C-10-I-PC174	CA	10	I	911.376	0.0013146	0.974901	0.973719	0.00118213
C-10-I-PC174	CA	10	I	640	0.0013146	0.978993	0.972756	0.00623728
C-10-I-PC174	CA	10	I	618	0.0013146	0.983845	0.986395	-0.00254984
C-10-I-PC174	CA	10	I	621	0.0013146	0.98956	0.978014	0.0115458
C-10-I-PC174	CA	10	I	575	0.0013146	0.98994	0.989084	0.00085528
C-10-I-PC174	CA	10	I	847.836	0.0013146	0.925833	0.889821	0.0360116
C-10-I-PC174	CA	10	I	1725.18	0.0013146	0.998291	0.996892	0.00139915
C-10-I-PC174	CA	10	I	750	0.0013146	0.90508	0.884116	0.0209642
C-10-I-PC174	CA	10	I	1082	0.0013146	0.958719	0.908719	0.05
C-10-I-PC174	CA	10	I	860.61	0.0013146	0.981849	0.995902	-0.0140522
C-10-I-PC174	CA	10	I	707	0.0013146	0.943986	0.884494	0.0594918
C-10-I-PC174	CA	10	I	860.61	0.0013146	0.981547	0.981228	0.000319272
C-10-I-PC174	CA	10	I	1863.48	0.0013146	0.937926	0.810754	0.127172
C-10-I-PC174	CA	10	I	1066.4	0.0013146	0.970559	0.864077	0.106482
C-10-I-PC174	CA	10	I	3163.15	0.0013146	0.977272	0.865217	0.112054
C-10-I-PC174	CA	10	I	3848.41	0.0013146	0.990531	0.973027	0.0175035
C-10-I-PC174	CA	10	I	956.112	0.0013146	0.980676	0.965632	0.0150439
C-10-I-PC174	CA	10	I	1061.09	0.0013146	0.846648	0.86919	-0.0225421
C-11-R-PC1	CA	11	R	3064.21	0.0343028	0.781702	0.63149	0.150212
C-11-R-PC1	CA	11	R	1570.63	0.0343028	0.835527	0.600534	0.234992
C-11-R-PC1	CA	11	R	3202	0.0343028	0.90026	0.561844	0.338416
C-11-R-PC1	CA	11	R	665.706	0.0343028	0.895371	0.936046	-0.0406752
C-11-R-PC1	CA	11	R	2655.28	0.0343028	0.844337	0.602694	0.241643
C-11-R-PC1	CA	11	R	1938.87	0.0343028	0.795194	0.749032	0.0461624
C-11-R-PC1	CA	11	R	984.915	0.0343028	0.904365	0.87755	0.0268156
C-11-R-PC1	CA	11	R	642.739	0.0343028	0.916285	0.667076	0.249209
C-11-R-PC1	CA	11	R	937.409	0.0343028	0.729604	0.844728	-0.115125
C-11-R-PC1	CA	11	R	1215.71	0.0343028	0.815706	0.90705	-0.0913442
C-11-R-PC1	CA	11	R	799.398	0.0343028	0.807446	0.886067	-0.0786209
C-11-R-PC1	CA	11	R	3364.36	0.0343028	0.835469	0.843324	-0.00785478
C-11-R-PC1	CA	11	R	3507.75	0.0343028	0.857205	0.687142	0.170063
C-11-R-PC1	CA	11	R	1017.39	0.0343028	0.848477	0.843419	0.00505778
C-11-R-PC1	CA	11	R	1059.43	0.0343028	0.844896	0.774562	0.0703337
C-11-R-PC1	CA	11	R	2018.85	0.0343028	0.757711	0.737042	0.0206688
C-11-R-PC1	CA	11	R	4083.28	0.0343028	0.855558	0.794573	0.0609857
C-11-R-PC1	CA	11	R	2928.81	0.0343028	0.882176	0.810728	0.071448
C-11-R-PC1	CA	11	R	1026.25	0.0343028	0.836322	0.860488	-0.0241662
C-11-R-PC1	CA	11	R	1691.96	0.0343028	0.834612	0.917652	-0.0830398
C-11-R-PC1	CA	11	R	1032.49	0.0343028	0.783119	0.756238	0.0268813
C-11-R-PC1	CA	11	R	3431	0.0343028	0.915311	0.941473	-0.0261617
C-11-R-PC1	CA	11	R	677.506	0.0343028	0.765797	0.801895	-0.036098
C-11-R-PC1	CA	11	R	723.227	0.0343028	0.920186	0.947544	-0.027358
C-11-R-PC1	CA	11	R	610.84	0.0343028	0.743729	0.851688	-0.107959
C-11-R-PC1	CA	11	R	1360.67	0.0343028	0.856494	0.663764	0.19273
C-11-R-PC1	CA	11	R	4644.05	0.0343028	0.886164	0.874661	0.0115036
C-11-R-PC1	CA	11	R	3998.01	0.0343028	0.839452	0.659977	0.179475
C-11-R-PC1	CA	11	R	2746.08	0.0343028	0.803461	0.82832	-0.0248591
C-11-R-PC1	CA	11	R	1063	0.0343028	0.794452	0.638707	0.155744
C-11-R-PC1	CA	11	R	2390.39	0.0343028	0.863049	0.892701	-0.0296529
C-11-R-PC1	CA	11	R	890	0.0343028	0.740109	0.506752	0.233358
C-11-R-PC1	CA	11	R	1016.25	0.0343028	0.89117	0.923989	-0.0328183
C-11-R-PC1	CA	11	R	1681	0.0343028	0.826171	0.790759	0.0354125
C-11-R-PC1	CA	11	R	3790.85	0.0343028	0.876054	0.897446	-0.0213919
C-11-R-PC1	CA	11	R	1197.63	0.0343028	0.793433	0.763075	0.0303584
C-11-R-PC1	CA	11	R	1687.01	0.0343028	0.914785	0.882673	0.0321111
C-11-R-PC1	CA	11	R	2399.64	0.0343028	0.702575	0.55675	0.145825
C-11-R-PC1	CA	11	R	2624	0.0343028	0.806551	0.798058	0.00849318
C-11-R-PC1	CA	11	R	678.261	0.0343028	0.782681	0.801408	-0.0187266
C-11-R-PC1	CA	11	R	740.201	0.0343028	0.861932	0.876216	-0.0142845
C-11-P-PC4	CA	11	P	1652.52	0.0315887	0.87329	0.865995	0.0072955
C-11-P-PC4	CA	11	P	3906.15	0.0315887	0.84624	0.747123	0.099117
C-11-P-PC4	CA	11	P	546.859	0.0315887	0.770786	0.802274	-0.0314876
C-11-P-PC4	CA	11	P	2418.97	0.0315887	0.813492	0.911886	-0.0983931
C-11-P-PC4	CA	11	P	558.409	0.0315887	0.87776	0.879446	-0.00168624
C-11-P-PC4	CA	11	P	1072.2	0.0315887	0.887137	0.931771	-0.0446336
C-11-P-PC4	CA	11	P	4558.55	0.0315887	0.75691	0.827219	-0.0703083
C-11-P-PC4	CA	11	P	593.636	0.0315887	0.786751	0.696014	0.0907369
C-11-P-PC4	CA	11	P	2885.54	0.0315887	0.828121	0.654737	0.173384
C-11-P-PC4	CA	11	P	3406.34	0.0315887	0.838707	0.946542	-0.107835
C-11-P-PC4	CA	11	P	993	0.0315887	0.780061	0.712415	0.0676458
C-11-P-PC4	CA	11	P	1890	0.0315887	0.814349	0.969587	-0.155238
C-11-P-PC4	CA	11	P	500.062	0.0315887	0.824932	0.753101	0.0718314
C-11-P-PC4	CA	11	P	2732.01	0.0315887	0.782153	0.538013	0.24414
C-11-P-PC4	CA	11	P	642.739	0.0315887	0.829472	0.828409	0.00106335
C-11-P-PC4	CA	11	P	1672.2	0.0315887	0.88538	0.957627	-0.0722471
C-11-P-PC4	CA	11	P	3250	0.0315887	0.864049	0.946911	-0.0828626
C-11-P-PC4	CA	11	P	949	0.0315887	0.82372	0.882097	-0.0583774
C-11-P-PC4	CA	11	P	1401	0.0315887	0.866794	0.827536	0.0392586
C-11-P-PC4	CA	11	P	2644.76	0.0315887	0.787544	0.71142	0.0761235
C-11-P-PC4	CA	11	P	2612.38	0.0315887	0.85628	0.843904	0.0123756
C-11-P-PC4	CA	11	P	1497.94	0.0315887	0.821988	0.886046	-0.064057
C-11-P-PC4	CA	11	P	2231.97	0.0315887	0.80902	0.517056	0.291964
C-11-P-PC4	CA	11	P	1750.04	0.0315887	0.855416	0.592661	0.262755
C-11-P-PC4	CA	11	P	3202.43	0.0315887	0.828932	0.838505	-0.0095724
C-11-P-PC4	CA	11	P	1956.19	0.0315887	0.874499	0.933581	-0.0590821
C-11-P-PC4	CA	11	P	1945.45	0.0315887	0.856921	0.893421	-0.0364998
C-11-P-PC4	CA	11	P	984.915	0.0315887	0.846766	0.739364	0.107402
C-11-P-PC4	CA	11	P	3008	0.0315887	0.770732	0.489866	0.280866
C-11-P-PC4	CA	11	P	896.842	0.0315887	0.811526	0.501031	0.310494
C-11-B-PC7	CA	11	B	593.479	0.0248201	0.862569	0.860185	0.00238396
C-11-B-PC7	CA	11	B	2797.13	0.0248201	0.900393	0.908475	-0.00808223
C-11-B-PC7	CA	11	B	948.159	0.0248201	0.829744	0.835597	-0.00585282
C-11-B-PC7	CA	11	B	2266.58	0.0248201	0.956742	0.864484	0.0922575
C-11-B-PC7	CA	11	B	1260.94	0.0248201	0.951182	0.980642	-0.0294602
C-11-B-PC7	CA	11	B	1557.87	0.0248201	0.950566	0.924998	0.0255677
C-11-B-PC7	CA	11	B	1331.41	0.0248201	0.864666	0.941466	-0.0767997
C-11-B-PC7	CA	11	B	2525.79	0.0248201	0.79228	0.499562	0.292718
C-11-B-PC7	CA	11	B	527.062	0.0248201	0.902486	0.842625	0.0598609
C-11-B-PC7	CA	11	B	1032.49	0.0248201	0.957915	0.853402	0.104513
C-11-B-PC7	CA	11	B	1269.54	0.0248201	0.928955	0.963309	-0.0343541
C-11-B-PC7	CA	11	B	775.647	0.0248201	0.921141	0.847957	0.0731836
C-11-B-PC7	CA	11	B	1874.43	0.0248201	0.880788	0.829061	0.0517276
C-11-B-PC7	CA	11	B	4761.55	0.0248201	0.937367	0.988576	-0.0512085
C-11-B-PC7	CA	11	B	4353.69	0.0248201	0.944097	0.969457	-0.0253605
C-11-B-PC7	CA	11	B	1735.94	0.0248201	0.864088	0.798194	0.0658941
C-11-B-PC7	CA	11	B	925.901	0.0248201	0.879663	0.723485	0.156178
C-11-B-PC7	CA	11	B	3542.36	0.0248201	0.956433	0.969583	-0.0131499
C-11-B-PC7	CA	11	B	1037.41	0.0248201	0.964716	0.889454	0.0752627
C-11-B-PC7	CA	11	B	837.078	0.0248201	0.895187	0.920013	-0.0248257
C-11-B-PC7	CA	11	B	4372.04	0.0248201	0.847873	0.512429	0.335444
C-11-B-PC7	CA	11	B	1610.89	0.0248201	0.929064	0.946113	-0.0170491
C-11-B-PC7	CA	11	B	1192.78	0.0248201	0.799551	0.889746	-0.0901945
C-11-B-PC7	CA	11	B	1719.85	0.0248201	0.766625	0.848406	-0.081781
C-11-B-PC7	CA	11	B	1832.54	0.0248201	0.918222	0.890787	0.0274353
C-11-B-PC7	CA	11	B	2721.37	0.0248201	0.956205	0.983177	-0.0269722
C-11-B-PC7	CA	11	B	1100.46	0.0248201	0.936364	0.950007	-0.0136429
C-11-B-PC7	CA	11	B	2555.07	0.0248201	0.988743	0.997015	-0.00827237
C-11-B-PC7	CA	11	B	1260.69	0.0248201	0.937579	0.897721	0.0398584
C-11-B-PC7	CA	11	B	500.067	0.0248201	0.851653	0.641132	0.210521
C-11-B-PC7	CA	11	B	898.702	0.0248201	0.82353	0.774221	0.0493092
C-11-B-PC7	CA	11	B	816.809	0.0248201	0.962102	0.946458	0.0156442
C-11-B-PC7	CA	11	B	1640.58	0.0248201	0.890082	0.902542	-0.0124593
C-11-B-PC7	CA	11	B	965.343	0.0248201	0.950505	0.966764	-0.016259
C-11-B-PC7	CA	11	B	2964	0.0248201	0.91553	0.825298	0.0902312
C-11-B-PC7	CA	11	B	2828.99	0.0248201	0.927971	0.769813	0.158158
C-11-B-PC7	CA	11	B	2231.97	0.0248201	0.933904	0.949615	-0.0157114
C-11-B-PC7	CA	11	B	1936.66	0.0248201	0.969285	0.976945	-0.00766001
C-11-B-PC7	CA	11	B	2652.45	0.0248201	0.929509	0.748181	0.181328
C-11-B-PC7	CA	11	B	778	0.0248201	0.77437	0.620407	0.153963
C-11-B-PC7	CA	11	B	1640	0.0248201	0.919747	0.765907	0.15384
C-11-B-PC7	CA	11	B	758.179	0.0248201	0.927616	0.886863	0.0407523
C-11-B-PC7	CA	11	B	1608.53	0.0248201	0.971852	0.983856	-0.0120041
C-11-B-PC7	CA	11	B	2323.22	0.0248201	0.906446	0.903245	0.00320055
C-11-B-PC7	CA	11	B	1017.45	0.0248201	0.913393	0.864238	0.0491551
C-11-B-PC7	CA	11	B	2273.7	0.0248201	0.872471	0.963191	-0.0907192
C-11-B-PC7	CA	11	B	1525.53	0.0248201	0.830237	0.689982	0.140255
C-11-B-PC7	CA	11	B	1246.67	0.0248201	0.907428	0.924106	-0.0166785
C-11-F-PC10	CA	11	F	1140.9	0.00336775	0.968602	0.977383	-0.00878105
C-11-F-PC10	CA	11	F	816.809	0.00336775	0.905316	0.785062	0.120255
C-11-F-PC10	CA	11	F	1138.98	0.00336775	0.89599	0.836992	0.0589975
C-11-F-PC10	CA	11	F	599.555	0.00336775	0.812649	0.887965	-0.0753163
C-11-F-PC10	CA	11	F	937.419	0.00336775	0.86284	0.638186	0.224655
C-12-I-PC28	CA	12	I	2273.98	0.00233993	0.824722	0.567888	0.256834
C-12-I-PC28	CA	12	I	3921.27	0.00233993	0.9025	0.971419	-0.0689196
C-12-P-PC31	CA	12	P	970.804	0.0367133	0.960098	0.958144	0.0019544
C-12-P-PC31	CA	12	P	1442.1	0.0367133	0.800304	0.531428	0.268876
C-12-P-PC31	CA	12	P	558.373	0.0367133	0.950995	0.947428	0.00356703
C-12-P-PC31	CA	12	P	1320	0.0367133	0.859866	0.844577	0.0152894
C-12-P-PC31	CA	12	P	2620	0.0367133	0.914634	0.937103	-0.0224694
C-12-P-PC31	CA	12	P	2183.87	0.0367133	0.779282	0.552505	0.226777
C-12-P-PC31	CA	12	P	2472.33	0.0367133	0.879089	0.966443	-0.0873543
C-12-P-PC31	CA	12	P	756.662	0.0367133	0.941127	0.91924	0.0218866
C-12-P-PC31	CA	12	P	1536.96	0.0367133	0.89034	0.679684	0.210656
C-12-P-PC31	CA	12	P	527.062	0.0367133	0.857145	0.829188	0.0279568
C-12-P-PC31	CA	12	P	2693.09	0.0367133	0.925069	0.940509	-0.0154397
C-12-P-PC31	CA	12	P	1575.11	0.0367133	0.942487	0.908752	0.033735
C-12-P-PC31	CA	12	P	861.247	0.0367133	0.93934	0.953667	-0.014327
C-12-P-PC31	CA	12	P	1028	0.0367133	0.917047	0.894154	0.0228924
C-12-P-PC31	CA	12	P	3877.86	0.0367133	0.922251	0.872382	0.0498685
C-12-P-PC31	CA	12	P	1076.42	0.0367133	0.872712	0.829223	0.0434886
C-12-P-PC31	CA	12	P	3938.54	0.0367133	0.92642	0.872346	0.0540744
C-12-P-PC31	CA	12	P	1422.25	0.0367133	0.847505	0.855958	-0.00845265
C-12-P-PC31	CA	12	P	943.006	0.0367133	0.935969	0.924306	0.0116635
C-12-P-PC31	CA	12	P	689.872	0.0367133	0.894014	0.946228	-0.0522135
C-12-P-PC31	CA	12	P	1259.22	0.0367133	0.79805	0.674751	0.1233
C-12-P-PC31	CA	12	P	1246.62	0.0367133	0.94152	0.945884	-0.00436416
C-12-P-PC31	CA	12	P	1116.13	0.0367133	0.90559	0.858106	0.0474831
C-12-P-PC31	CA	12	P	1037.43	0.0367133	0.939465	0.97737	-0.0379052
C-12-P-PC31	CA	12	P	650	0.0367133	0.804278	0.658791	0.145487
C-12-P-PC31	CA	12	P	2181.89	0.0367133	0.926466	0.91902	0.00744579
C-12-P-PC31	CA	12	P	1732.19	0.0367133	0.908496	0.943419	-0.0349237
C-12-P-PC31	CA	12	P	1070	0.0367133	0.854299	0.805078	0.0492209
C-12-P-PC31	CA	12	P	1265	0.0367133	0.814444	0.777146	0.037298
C-12-P-PC31	CA	12	P	721.103	0.0367133	0.966516	0.956428	0.0100874
C-12-P-PC31	CA	12	P	1320	0.0367133	0.96098	0.971432	-0.0104521
C-12-P-PC31	CA	12	P	1040	0.0367133	0.930367	0.926709	0.00365794
C-12-P-PC31	CA	12	P	513.38	0.0367133	0.716765	0.805055	-0.0882898
C-12-P-PC31	CA	12	P	1544.68	0.0367133	0.895579	0.550781	0.344797
C-12-P-PC31	CA	12	P	1285.65	0.0367133	0.95078	0.908246	0.042534
C-12-P-PC31	CA	12	P	1603.62	0.0367133	0.912262	0.865072	0.0471901
C-12-P-PC31	CA	12	P	1948.79	0.0367133	0.809976	0.874932	-0.0649563
C-12-P-PC31	CA	12	P	2708.77	0.0367133	0.851898	0.973177	-0.121279
C-12-P-PC31	CA	12	P	588.375	0.0367133	0.895948	0.969304	-0.0733561
C-12-P-PC31	CA	12	P	1260.68	0.0367133	0.91945	0.969304	-0.0498537
C-12-P-PC31	CA	12	P	1070	0.0367133	0.832356	0.83943	-0.00707392
C-12-B-PC34	CA	12	B	2034.78	0.0047523	0.868218	0.917779	-0.0495609
C-12-B-PC34	CA	12	B	848.34	0.0047523	0.937661	0.830228	0.107433
C-12-B-PC34	CA	12	B	1138.97	0.0047523	0.808845	0.723471	0.0853742
C-12-B-PC34	CA	12	B	1735.96	0.0047523	0.931116	0.675636	0.25548
C-12-B-PC34	CA	12	B	737.652	0.0047523	0.978357	0.948395	0.0299618
C-12-B-PC34	CA	12	B	1833.07	0.0047523	0.949473	0.974344	-0.0248709
C-12-B-PC34	CA	12	B	2598.97	0.0047523	0.908856	0.800046	0.10881
C-12-B-PC34	CA	12	B	1337.15	0.0047523	0.825145	0.725346	0.0997987
C-12-B-PC34	CA	12	B	925.911	0.0047523	0.724631	0.761233	-0.0366021
C-12-B-PC34	CA	12	B	2040	0.0047523	0.976993	0.898851	0.0781428
C-12-B-PC34	CA	12	B	1953.36	0.0047523	0.91677	0.794089	0.122681
C-12-B-PC34	CA	12	B	1371.88	0.0047523	0.99415	0.993583	0.000566243
C-12-B-PC34	CA	12	B	937.409	0.0047523	0.837791	0.73462	0.103171
C-12-B-PC34	CA	12	B	1798.07	0.0047523	0.945793	0.800959	0.144834
C-12-B-PC34	CA	12	B	1360	0.0047523	0.878652	0.838401	0.0402505
C-12-B-PC34	CA	12	B	1054.13	0.0047523	0.993417	0.991997	0.00141928
C-12-B-PC34	CA	12	B	2013.08	0.0047523	0.977168	0.934026	0.0431419
C-12-R-PC37	CA	12	R	1303.17	0.036136	0.847416	0.873545	-0.026129
C-12-R-PC37	CA	12	R	2469.44	0.036136	0.787099	0.929631	-0.142532
C-12-R-PC37	CA	12	R	1428.15	0.036136	0.865096	0.775482	0.0896138
C-12-R-PC37	CA	12	R	1614.32	0.036136	0.793415	0.907215	-0.113801
C-12-R-PC37	CA	12	R	2084.5	0.036136	0.831176	0.841461	-0.0102847
C-12-R-PC37	CA	12	R	1769	0.036136	0.77922	0.87839	-0.0991707
C-12-R-PC37	CA	12	R	2137.2	0.036136	0.764376	0.586732	0.177644
C-12-R-PC37	CA	12	R	1016.26	0.036136	0.872827	0.896219	-0.023392
C-12-R-PC37	CA	12	R	617.359	0.036136	0.903762	0.915058	-0.0112963
C-12-R-PC37	CA	12	R	2286.07	0.036136	0.927113	0.967181	-0.0400686
C-12-R-PC37	CA	12	R	649.595	0.036136	0.829744	0.575449	0.254295
C-12-R-PC37	CA	12	R	2409.69	0.036136	0.875927	0.641677	0.23425
C-12-R-PC37	CA	12	R	1302.23	0.036136	0.890326	0.92664	-0.0363146
C-12-R-PC37	CA	12	R	678.261	0.036136	0.834732	0.797725	0.0370071
C-12-R-PC37	CA	12	R	984.915	0.036136	0.869771	0.962827	-0.0930566
C-12-R-PC37	CA	12	R	902.269	0.036136	0.9488	0.946469	0.00233025
C-12-R-PC37	CA	12	R	843.923	0.036136	0.956381	0.944863	0.0115181
C-12-R-PC37	CA	12	R	1573.47	0.036136	0.802755	0.856626	-0.0538714
C-12-R-PC37	CA	12	R	2279.28	0.036136	0.907359	0.944863	-0.0375042
C-12-R-PC37	CA	12	R	671.481	0.036136	0.702908	0.60125	0.101658
C-12-R-PC37	CA	12	R	916.26	0.036136	0.756632	0.613984	0.142648
C-12-R-PC37	CA	12	R	779.499	0.036136	0.809328	0.83868	-0.029352
C-12-R-PC37	CA	12	R	1347.48	0.036136	0.908526	0.758594	0.149932
C-12-R-PC37	CA	12	R	3732.42	0.036136	0.834989	0.710846	0.124142
C-12-R-PC37	CA	12	R	523.543	0.036136	0.776243	0.655559	0.120684
C-12-R-PC37	CA	12	R	508.696	0.036136	0.823962	0.799	0.0249619
C-12-R-PC37	CA	12	R	1720	0.036136	0.895965	0.845508	0.0504574
C-12-R-PC37	CA	12	R	3708.89	0.036136	0.901331	0.894458	0.00687287
C-12-R-PC37	CA	12	R	779.499	0.036136	0.817276	0.732955	0.0843215
C-12-R-PC37	CA	12	R	2039.84	0.036136	0.903069	0.801713	0.101356
C-12-R-PC37	CA	12	R	3434	0.036136	0.890187	0.953559	-0.0633721
C-12-R-PC37	CA	12	R	1388.52	0.036136	0.88857	0.868987	0.0195829
C-12-R-PC37	CA	12	R	812.049	0.036136	0.869599	0.86561	0.00398903
C-13-F-PC141	CA	13	F	1363.66	0.0279252	0.966355	0.949382	0.0169722
C-13-F-PC141	CA	13	F	848.34	0.0279252	0.869531	0.676168	0.193363
C-13-F-PC141	CA	13	F	956.112	0.0279252	0.981981	0.966827	0.015154
C-13-F-PC141	CA	13	F	1174.57	0.0279252	0.953281	0.901071	0.0522104
C-13-F-PC141	CA	13	F	1249.62	0.0279252	0.97428	0.940881	0.0333991
C-13-F-PC141	CA	13	F	1516.66	0.0279252	0.987044	0.98459	0.00245417
C-13-F-PC141	CA	13	F	890.2	0.0279252	0.984027	0.879886	0.104141
C-13-F-PC141	CA	13	F	2311.36	0.0279252	0.960677	0.972107	-0.0114306
C-13-F-PC141	CA	13	F	790.6	0.0279252	0.898982	0.919476	-0.020494
C-13-F-PC141	CA	13	F	710.6	0.0279252	0.754123	0.617178	0.136945
C-13-F-PC141	CA	13	F	3535.45	0.0279252	0.955401	0.965825	-0.0104238
C-13-F-PC141	CA	13	F	2917.44	0.0279252	0.956873	0.905962	0.0509109
C-13-F-PC141	CA	13	F	1780.44	0.0279252	0.965526	0.936196	0.0293295
C-13-I-PC164	CA	13	I	3583.92	0.00872962	0.986748	1	-0.0132521
C-13-I-PC164	CA	13	I	1163	0.00872962	0.72383	0.721039	0.0027911
C-13-I-PC164	CA	13	I	1122.96	0.00872962	0.705324	0.694176	0.0111484
C-13-I-PC164	CA	13	I	966.06	0.00872962	0.99619	0.984951	0.0112394
C-13-I-PC164	CA	13	I	898.415	0.00872962	0.720569	0.701107	0.019462
C-13-I-PC164	CA	13	I	4561	0.00872962	0.970908	0.81632	0.154588
C-13-I-PC164	CA	13	I	1178.31	0.00872962	0.95693	0.98493	-0.0280008
C-13-R-PC165	CA	13	R	558.307	0.026936	0.956827	0.805801	0.151026
C-13-R-PC165	CA	13	R	2362.1	0.026936	0.979757	0.989459	-0.00970271
C-13-R-PC165	CA	13	R	1074	0.026936	0.95319	0.743373	0.209817
C-13-R-PC165	CA	13	R	1246.6	0.026936	0.759839	0.751295	0.00854462
C-13-R-PC165	CA	13	R	2231.52	0.026936	0.86788	0.615303	0.252576
C-13-R-PC165	CA	13	R	677.506	0.026936	0.893911	0.906293	-0.012382
C-13-R-PC165	CA	13	R	1997.12	0.026936	0.969925	0.88084	0.0890854
C-13-R-PC165	CA	13	R	3636.33	0.026936	0.95829	0.819103	0.139187
C-13-R-PC165	CA	13	R	4791	0.026936	0.975397	0.849621	0.125776
C-13-R-PC165	CA	13	R	1204	0.026936	0.981811	0.972384	0.00942735
C-13-R-PC165	CA	13	R	777.8	0.026936	0.993231	0.991607	0.00162457
C-13-R-PC165	CA	13	R	1139.64	0.026936	0.927359	0.757938	0.169421
C-13-R-PC165	CA	13	R	895.965	0.026936	0.980651	0.940454	0.0401965
C-13-R-PC165	CA	13	R	1116.12	0.026936	0.805091	0.733557	0.0715342
C-13-R-PC165	CA	13	R	538.203	0.026936	0.926632	0.928349	-0.00171666
C-13-R-PC165	CA	13	R	937.409	0.026936	0.987943	0.975486	0.012457
C-13-R-PC165	CA	13	R	1534.15	0.026936	0.983811	0.981516	0.00229502
C-13-R-PC165	CA	13	R	1224.65	0.026936	0.943134	0.908264	0.0348707
C-13-R-PC165	CA	13	R	1026.25	0.026936	0.91954	0.879515	0.0400255
C-13-R-PC165	CA	13	R	2244.54	0.026936	0.946245	0.666693	0.279552
C-13-R-PC165	CA	13	R	714.798	0.026936	0.925773	0.882388	0.0433858
C-13-R-PC165	CA	13	R	1246.6	0.026936	0.978094	0.846981	0.131113
C-13-R-PC165	CA	13	R	3824.45	0.026936	0.927337	0.710828	0.216509
C-13-R-PC165	CA	13	R	799.398	0.026936	0.843467	0.883857	-0.0403908
C-13-R-PC165	CA	13	R	1608.3	0.026936	0.962826	0.601809	0.361017
C-13-R-PC165	CA	13	R	1308.15	0.026936	0.940654	0.945454	-0.00479976
C-13-R-PC165	CA	13	R	1925.17	0.026936	0.822412	0.830618	-0.00820618
C-13-R-PC165	CA	13	R	1029.79	0.026936	0.892941	0.926698	-0.0337568
C-13-R-PC165	CA	13	R	1504	0.026936	0.893115	0.733612	0.159503
C-13-R-PC165	CA	13	R	1164.9	0.026936	0.929392	0.831462	0.0979294
C-13-R-PC165	CA	13	R	1058.12	0.026936	0.980151	0.995188	-0.0150371
C-13-R-PC165	CA	13	R	1478	0.026936	0.877102	0.85393	0.0231722
C-13-R-PC165	CA	13	R	761.6	0.026936	0.982616	0.836499	0.146117
C-13-R-PC165	CA	13	R	1614.61	0.026936	0.959414	0.96197	-0.00255607
C-13-R-PC165	CA	13	R	2313.75	0.026936	0.963272	0.848738	0.114534
C-13-R-PC165	CA	13	R	4182.38	0.026936	0.91954	0.744924	0.174616
C-13-R-PC165	CA	13	R	1101	0.026936	0.917683	0.896222	0.0214606
C-13-R-PC165	CA	13	R	2828	0.026936	0.966813	0.920726	0.0460867
C-13-I-PC166	CA	13	I	1116.12	0.0260627	0.760691	0.854123	-0.0934326
C-13-I-PC166	CA	13	I	1119	0.0260627	0.923208	0.90487	0.018338
C-13-I-PC166	CA	13	I	1946	0.0260627	0.898732	0.837452	0.0612799
C-13-I-PC166	CA	13	I	4484.54	0.0260627	0.805277	0.554258	0.251019
C-13-I-PC166	CA	13	I	3037	0.0260627	0.951647	0.978664	-0.0270165
C-13-I-PC166	CA	13	I	2496.66	0.0260627	0.929632	0.95722	-0.0275881
C-13-I-PC166	CA	13	I	1787	0.0260627	0.959797	0.955757	0.00403994
C-13-I-PC166	CA	13	I	1087.15	0.0260627	0.914287	0.90282	0.0114666
C-13-I-PC166	CA	13	I	3150.84	0.0260627	0.735409	0.705726	0.0296832
C-13-I-PC166	CA	13	I	2721.34	0.0260627	0.952251	0.951434	0.000816661
C-13-I-PC166	CA	13	I	1835.33	0.0260627	0.75993	0.94373	-0.1838
C-13-I-PC166	CA	13	I	3427.08	0.0260627	0.940024	0.911805	0.0282191
C-13-I-PC166	CA	13	I	906	0.0260627	0.789788	0.548061	0.241727
C-13-I-PC166	CA	13	I	982	0.0260627	0.95907	0.983159	-0.0240891
C-13-I-PC166	CA	13	I	2712.53	0.0260627	0.897756	0.640878	0.256878
C-13-I-PC166	CA	13	I	3665.08	0.0260627	0.787339	0.530814	0.256525
C-13-I-PC166	CA	13	I	3805.48	0.0260627	0.961585	0.841115	0.12047
C-13-I-PC166	CA	13	I	1716.64	0.0260627	0.925349	0.922892	0.00245699
C-13-I-PC166	CA	13	I	2500.34	0.0260627	0.915205	0.912634	0.00257017
C-13-I-PC166	CA	13	I	1289.66	0.0260627	0.871291	0.875335	-0.004044
C-13-I-PC166	CA	13	I	1560.96	0.0260627	0.970609	0.925525	0.0450839
C-13-I-PC166	CA	13	I	3800.35	0.0260627	0.936387	0.98762	-0.0512332
C-13-I-PC166	CA	13	I	976.601	0.0260627	0.893291	0.902909	-0.00961801
C-13-I-PC166	CA	13	I	1262.89	0.0260627	0.858505	0.940462	-0.081957
C-13-I-PC166	CA	13	I	1599	0.0260627	0.921735	0.840245	0.0814894
C-13-I-PC166	CA	13	I	1441.31	0.0260627	0.994082	0.982043	0.0120394
C-14-F-PC42	CA	14	F	1865.22	0.0314975	0.860541	0.897833	-0.0372924
C-14-F-PC42	CA	14	F	1246.6	0.0314975	0.847616	0.753132	0.0944841
C-14-F-PC42	CA	14	F	2813.81	0.0314975	0.932347	0.766967	0.165379
C-14-F-PC42	CA	14	F	2860.86	0.0314975	0.8862	0.902118	-0.0159183
C-14-F-PC42	CA	14	F	2231.97	0.0314975	0.917662	0.817082	0.10058
C-14-F-PC42	CA	14	F	1337.91	0.0314975	0.974462	0.923043	0.0514195
C-14-F-PC42	CA	14	F	1221.68	0.0314975	0.917637	0.923717	-0.00607962
C-14-F-PC42	CA	14	F	2293.36	0.0314975	0.793962	0.823427	-0.0294646
C-14-F-PC42	CA	14	F	1093.72	0.0314975	0.888407	0.846787	0.0416196
C-14-F-PC42	CA	14	F	678.261	0.0314975	0.765843	0.745182	0.0206617
C-14-F-PC42	CA	14	F	2811.06	0.0314975	0.934944	0.848608	0.0863352
C-14-F-PC42	CA	14	F	1508.29	0.0314975	0.96051	0.761918	0.198592
C-14-F-PC42	CA	14	F	1260.94	0.0314975	0.858728	0.755622	0.103106
C-14-F-PC42	CA	14	F	2326.94	0.0314975	0.902114	0.8665	0.0356136
C-14-F-PC42	CA	14	F	924.179	0.0314975	0.768574	0.69363	0.0749439
C-14-F-PC42	CA	14	F	1685.83	0.0314975	0.901781	0.756415	0.145366
C-14-F-PC42	CA	14	F	1163.47	0.0314975	0.884061	0.79694	0.0871218
C-14-F-PC42	CA	14	F	2932.84	0.0314975	0.967715	0.946748	0.0209669
C-14-F-PC42	CA	14	F	1974.71	0.0314975	0.971869	0.974232	-0.00236306
C-14-F-PC42	CA	14	F	712.621	0.0314975	0.918441	0.846766	0.0716752
C-14-F-PC42	CA	14	F	2128.2	0.0314975	0.920026	0.807952	0.112075
C-14-F-PC42	CA	14	F	2571.31	0.0314975	0.877815	0.616367	0.261448
C-14-F-PC42	CA	14	F	1740.78	0.0314975	0.916659	0.832134	0.0845246
C-14-F-PC42	CA	14	F	1119.41	0.0314975	0.949532	0.784901	0.164631
C-14-F-PC42	CA	14	F	500.062	0.0314975	0.855546	0.660424	0.195122
C-14-F-PC42	CA	14	F	2198.35	0.0314975	0.932707	0.917989	0.014718
C-14-F-PC42	CA	14	F	1377.32	0.0314975	0.974858	0.972874	0.00198381
C-14-F-PC42	CA	14	F	1033.4	0.0314975	0.882441	0.828412	0.0540289
C-14-F-PC42	CA	14	F	2832.92	0.0314975	0.952171	0.843291	0.10888
C-14-F-PC42	CA	14	F	1154	0.0314975	0.918917	0.879563	0.0393534
C-14-F-PC42	CA	14	F	721.095	0.0314975	0.885714	0.876847	0.00886734
C-14-F-PC42	CA	14	F	2710.02	0.0314975	0.93882	0.891471	0.0473484
C-14-F-PC42	CA	14	F	1459.93	0.0314975	0.772519	0.887239	-0.114719
C-14-F-PC42	CA	14	F	1049.1	0.0314975	0.938763	0.926648	0.0121147
C-14-F-PC42	CA	14	F	4905.99	0.0314975	0.810784	0.761436	0.0493479
C-14-F-PC42	CA	14	F	837.087	0.0314975	0.920096	0.816698	0.103398
C-14-F-PC42	CA	14	F	2371.27	0.0314975	0.889416	0.563861	0.325555
C-14-F-PC42	CA	14	F	1417.16	0.0314975	0.919115	0.957056	-0.0379418
C-14-F-PC42	CA	14	F	2061.48	0.0314975	0.910784	0.912338	-0.00155411
C-14-F-PC42	CA	14	F	694.433	0.0314975	0.782309	0.912174	-0.129866
C-14-F-PC42	CA	14	F	2616.3	0.0314975	0.901703	0.69056	0.211142
C-14-F-PC42	CA	14	F	508.696	0.0314975	0.886878	0.826315	0.0605625
C-14-F-PC42	CA	14	F	1304	0.0314975	0.766514	0.595841	0.170673
C-14-F-PC42	CA	14	F	3039.23	0.0314975	0.827682	0.524101	0.303581
C-14-F-PC42	CA	14	F	3278.27	0.0314975	0.725783	0.891626	-0.165844
C-14-F-PC42	CA	14	F	3720.97	0.0314975	0.760339	0.586572	0.173767
C-14-F-PC42	CA	14	F	3030.42	0.0314975	0.954972	0.940549	0.0144238
C-14-F-PC42	CA	14	F	3131.59	0.0314975	0.971219	0.982219	-0.0109995
C-14-F-PC42	CA	14	F	2286.07	0.0314975	0.772746	0.859121	-0.0863746
C-14-I-PC48	CA	14	I	2069.59	0.00308789	0.972629	0.917377	0.0552525
C-14-I-PC48	CA	14	I	1560.96	0.00308789	0.93344	0.831354	0.102086
C-14-I-PC48	CA	14	I	2255.67	0.00308789	0.981071	0.895557	0.0855133
C-14-I-PC48	CA	14	I	2101.13	0.00308789	0.898452	0.569791	0.328661
C-14-I-PC48	CA	14	I	2289.13	0.00308789	0.943689	0.947803	-0.00411442
C-14-I-PC48	CA	14	I	1753.91	0.00308789	0.794017	0.76662	0.0273974
C-14-I-PC48	CA	14	I	3267.31	0.00308789	0.954414	0.766597	0.187816
C-14-I-PC48	CA	14	I	902.269	0.00308789	0.888436	0.744908	0.143528
C-14-I-PC48	CA	14	I	1250.9	0.00308789	0.957231	0.969169	-0.0119372
C-14-I-PC48	CA	14	I	649.595	0.00308789	0.994358	0.999616	-0.00525731
C-14-I-PC48	CA	14	I	3343	0.00308789	0.975179	0.889323	0.0858559
C-14-I-PC48	CA	14	I	1088.73	0.00308789	0.979203	0.912324	0.0668784
C-14-B-PC51	CA	14	B	3361.8	0.00241309	0.935148	0.879876	0.0552721
C-14-B-PC51	CA	14	B	2628.59	0.00241309	0.976026	0.951017	0.0250097
C-14-B-PC51	CA	14	B	750	0.00241309	0.947422	0.991338	-0.0439157
C-14-B-PC51	CA	14	B	932.069	0.00241309	0.974313	0.92103	0.0532832
C-14-B-PC51	CA	14	B	900	0.00241309	0.985211	0.97661	0.00860122
C-14-B-PC51	CA	14	B	600	0.00241309	0.931684	0.994201	-0.0625173
C-14-B-PC51	CA	14	B	1000	0.00241309	0.987769	0.98326	0.00450954
C-14-B-PC51	CA	14	B	600	0.00241309	0.980508	0.98926	-0.00875261
C-14-B-PC51	CA	14	B	2150.74	0.00241309	0.974579	0.905349	0.0692299
C-14-B-PC51	CA	14	B	1058.13	0.00241309	0.916201	0.886558	0.0296431
C-14-B-PC51	CA	14	B	1753.77	0.00241309	0.97782	0.967994	0.00982626
C-14-B-PC51	CA	14	B	2174.33	0.00241309	0.935613	0.762871	0.172741
C-14-B-PC51	CA	14	B	1480.42	0.00241309	0.958372	0.84108	0.117291
B-15-R-PC13	CA	15	R	1608.46	0.0183699	0.865709	0.57677	0.288939
B-15-R-PC13	CA	15	R	1199.11	0.0183699	0.873724	0.727112	0.146612
B-15-R-PC13	CA	15	R	1540.16	0.0183699	0.849942	0.84674	0.0032027
B-15-R-PC13	CA	15	R	1096.78	0.0183699	0.953498	0.955691	-0.00219337
B-15-R-PC13	CA	15	R	1221.69	0.0183699	0.849943	0.823801	0.0261421
B-15-R-PC13	CA	15	R	876.965	0.0183699	0.824852	0.67389	0.150962
B-15-R-PC13	CA	15	R	1492.02	0.0183699	0.818868	0.868225	-0.0493566
B-15-R-PC13	CA	15	R	1383	0.0183699	0.977303	0.997234	-0.0199316
B-15-R-PC13	CA	15	R	1433	0.0183699	0.771664	0.934383	-0.162719
B-15-R-PC13	CA	15	R	850	0.0183699	0.92859	0.938314	-0.00972414
B-15-R-PC13	CA	15	R	2311.26	0.0183699	0.937027	0.647558	0.289468
B-15-R-PC13	CA	15	R	1639.72	0.0183699	0.939991	0.880354	0.0596364
B-15-R-PC13	CA	15	R	578.66	0.0183699	0.94699	0.770404	0.176586
B-15-R-PC13	CA	15	R	1953.22	0.0183699	0.844496	0.799024	0.0454724
B-15-R-PC13	CA	15	R	1814.08	0.0183699	0.956148	0.951551	0.00459686
B-15-R-PC13	CA	15	R	770.078	0.0183699	0.865917	0.7955	0.0704171
B-15-R-PC13	CA	15	R	3267.34	0.0183699	0.908245	0.654471	0.253774
B-15-R-PC13	CA	15	R	4058.83	0.0183699	0.886925	0.590254	0.296671
B-15-R-PC13	CA	15	R	1858.47	0.0183699	0.895642	0.693422	0.20222
B-15-R-PC13	CA	15	R	2668.89	0.0183699	0.925192	0.756661	0.168531
B-15-R-PC13	CA	15	R	1047.09	0.0183699	0.884635	0.729967	0.154668
B-15-R-PC13	CA	15	R	3417.8	0.0183699	0.929712	0.955433	-0.0257211
B-15-R-PC13	CA	15	R	1169.25	0.0183699	0.944273	0.826021	0.118252
B-15-R-PC13	CA	15	R	1459.93	0.0183699	0.914779	0.721898	0.192881
B-15-R-PC13	CA	15	R	863.829	0.0183699	0.898148	0.85169	0.0464579
B-15-R-PC13	CA	15	R	1646.3	0.0183699	0.812523	0.835742	-0.023219
B-15-R-PC13	CA	15	R	897.45	0.0183699	0.914106	0.755079	0.159027
B-15-R-PC13	CA	15	R	1234.72	0.0183699	0.900853	0.58143	0.319423
B-15-R-PC13	CA	15	R	3827.37	0.0183699	0.938832	0.749522	0.18931
B-15-R-PC13	CA	15	R	662.729	0.0183699	0.802787	0.81631	-0.0135224
B-15-R-PC13	CA	15	R	801.927	0.0183699	0.904282	0.893573	0.0107089
B-15-R-PC13	CA	15	R	2197.76	0.0183699	0.89927	0.93186	-0.0325898
B-15-R-PC13	CA	15	R	1184.77	0.0183699	0.86243	0.873864	-0.011434
B-15-R-PC13	CA	15	R	887.609	0.0183699	0.944364	0.962439	-0.0180754
B-15-R-PC13	CA	15	R	1055	0.0183699	0.950613	0.918271	0.0323419
B-15-R-PC13	CA	15	R	1092	0.0183699	0.887751	0.934601	-0.0468495
B-15-R-PC13	CA	15	R	3619.5	0.0183699	0.802651	0.717307	0.0853437
B-15-R-PC13	CA	15	R	903	0.0183699	0.830366	0.766377	0.0639887
B-15-R-PC13	CA	15	R	613	0.0183699	0.886681	0.798918	0.0877632
B-15-R-PC13	CA	15	R	1279.15	0.0183699	0.886707	0.861402	0.0253053
B-15-R-PC13	CA	15	R	2954.75	0.0183699	0.928813	0.803546	0.125267
B-15-R-PC13	CA	15	R	916.26	0.0183699	0.979503	0.956555	0.0229478
B-15-R-PC13	CA	15	R	757	0.0183699	0.927186	0.768493	0.158693
B-15-R-PC13	CA	15	R	660	0.0183699	0.72203	0.899627	-0.177596
B-15-R-PC13	CA	15	R	1508.31	0.0183699	0.871424	0.64197	0.229454
B-15-R-PC13	CA	15	R	3275.27	0.0183699	0.840335	0.778542	0.0617926
B-15-R-PC13	CA	15	R	1174.58	0.0183699	0.879563	0.701417	0.178146
B-15-R-PC13	CA	15	R	1250.91	0.0183699	0.875224	0.905794	-0.0305696
B-15-R-PC13	CA	15	R	593.485	0.0183699	0.922866	0.855238	0.0676282
B-15-R-PC13	CA	15	R	3521.16	0.0183699	0.894622	0.892655	0.00196678
B-15-R-PC13	CA	15	R	925.921	0.0183699	0.84361	0.840084	0.00352588
B-15-B-PC16	CA	15	B	1116.82	0.00592196	0.953506	0.958349	-0.00484265
B-15-B-PC16	CA	15	B	1991	0.00592196	0.930821	0.996665	-0.0658432
B-15-B-PC16	CA	15	B	1759.71	0.00592196	0.967085	0.705863	0.261222
B-15-B-PC16	CA	15	B	974.393	0.00592196	0.966529	0.924672	0.0418572
B-15-B-PC16	CA	15	B	727.266	0.00592196	0.961294	0.899861	0.0614327
B-15-B-PC16	CA	15	B	779.499	0.00592196	0.971437	0.960408	0.0110287
B-15-B-PC16	CA	15	B	1942.25	0.00592196	0.976044	0.991243	-0.0151988
B-15-B-PC16	CA	15	B	1026.63	0.00592196	0.911288	0.776682	0.134606
B-15-B-PC16	CA	15	B	827.7	0.00592196	0.89437	0.91608	-0.0217102
B-15-B-PC16	CA	15	B	881.606	0.00592196	0.974393	0.97247	0.00192284
B-15-B-PC16	CA	15	B	2963.81	0.00592196	0.944355	0.763398	0.180957
B-15-B-PC16	CA	15	B	1891.59	0.00592196	0.903509	0.878527	0.0249824
B-15-B-PC16	CA	15	B	841.24	0.00592196	0.955654	0.888417	0.0672366
B-15-B-PC16	CA	15	B	1779.25	0.00592196	0.939578	0.799555	0.140023
B-15-B-PC16	CA	15	B	887.628	0.00592196	0.905088	0.796465	0.108623
B-15-B-PC16	CA	15	B	4350.47	0.00592196	0.960209	0.931393	0.0288156
B-15-B-PC16	CA	15	B	1093.57	0.00592196	0.87334	0.772493	0.100847
B-15-B-PC16	CA	15	B	2165.84	0.00592196	0.886487	0.813008	0.0734794
B-15-B-PC16	CA	15	B	4965.56	0.00592196	0.848843	0.921746	-0.0729025
B-15-B-PC16	CA	15	B	3654.25	0.00592196	0.93163	0.787237	0.144393
B-15-B-PC16	CA	15	B	2612.55	0.00592196	0.937236	0.980855	-0.0436186
B-15-B-PC16	CA	15	B	2050.36	0.00592196	0.944604	0.801416	0.143188
B-15-B-PC16	CA	15	B	779.108	0.00592196	0.751251	0.86715	-0.115899
B-15-B-PC16	CA	15	B	1084.94	0.00592196	0.901974	0.59226	0.309715
B-15-B-PC16	CA	15	B	538.208	0.00592196	0.910912	0.949096	-0.0381839
B-15-B-PC16	CA	15	B	2085.53	0.00592196	0.747843	0.61762	0.130223
B-15-B-PC16	CA	15	B	1481.89	0.00592196	0.961108	0.921931	0.0391767
B-15-B-PC16	CA	15	B	2536.23	0.00592196	0.861543	0.94568	-0.0841365
B-15-B-PC16	CA	15	B	1087	0.00592196	0.946498	0.967489	-0.0209912
B-15-B-PC16	CA	15	B	818.218	0.00592196	0.974776	0.859711	0.115064
B-15-B-PC16	CA	15	B	1434.92	0.00592196	0.957484	0.969257	-0.0117737
B-15-B-PC16	CA	15	B	1100.46	0.00592196	0.928289	0.912927	0.0153621
B-15-B-PC16	CA	15	B	612.33	0.00592196	0.978277	0.92144	0.056837
B-15-B-PC16	CA	15	B	981.625	0.00592196	0.886783	0.842194	0.0445886
B-15-B-PC16	CA	15	B	2024.99	0.00592196	0.924801	0.953089	-0.028288
B-15-B-PC16	CA	15	B	2184.01	0.00592196	0.907854	0.903941	0.00391334
B-15-B-PC16	CA	15	B	1366	0.00592196	0.86204	0.671214	0.190826
B-15-B-PC16	CA	15	B	2280	0.00592196	0.899776	0.640331	0.259444
B-15-B-PC16	CA	15	B	800.622	0.00592196	0.879695	0.581164	0.298531
B-15-B-PC16	CA	15	B	2668.89	0.00592196	0.879038	0.725329	0.153709
B-15-B-PC16	CA	15	B	1636.57	0.00592196	0.936545	0.910634	0.0259115
B-15-B-PC16	CA	15	B	678.261	0.00592196	0.958606	0.894831	0.0637755
B-15-B-PC16	CA	15	B	1184.77	0.00592196	0.919994	0.874178	0.0458161
B-15-B-PC16	CA	15	B	2726.47	0.00592196	0.968296	0.9442	0.0240967
B-15-B-PC16	CA	15	B	2283.25	0.00592196	0.97018	0.950774	0.0194054
B-15-B-PC16	CA	15	B	661.388	0.00592196	0.924237	0.952359	-0.0281225
B-15-B-PC16	CA	15	B	2128.2	0.00592196	0.796877	0.608109	0.188767
B-15-B-PC16	CA	15	B	3308.37	0.00592196	0.891443	0.6289	0.262543
B-15-P-PC22	CA	15	P	2634.96	0.014647	0.989821	0.996146	-0.00632527
B-15-P-PC22	CA	15	P	872.164	0.014647	0.851682	0.928384	-0.0767017
B-15-P-PC22	CA	15	P	2021.45	0.014647	0.984198	0.96768	0.0165183
B-15-P-PC22	CA	15	P	3673.94	0.014647	0.987235	0.977613	0.00962167
B-15-P-PC22	CA	15	P	2210.56	0.014647	0.971043	0.984119	-0.013076
B-15-P-PC22	CA	15	P	918.605	0.014647	0.866582	0.878362	-0.0117798
B-15-P-PC22	CA	15	P	593.636	0.014647	0.751263	0.858281	-0.107018
B-15-P-PC22	CA	15	P	516.702	0.014647	0.901913	0.900601	0.00131238
B-15-P-PC22	CA	15	P	1360.67	0.014647	0.960184	0.896584	0.0635996
B-15-P-PC22	CA	15	P	850.276	0.014647	0.910442	0.733976	0.176467
B-15-P-PC22	CA	15	P	1047.09	0.014647	0.782275	0.862148	-0.0798731
B-15-P-PC22	CA	15	P	1969.6	0.014647	0.952801	0.980076	-0.0272741
B-15-P-PC22	CA	15	P	1275.86	0.014647	0.897633	0.746147	0.151486
B-15-P-PC22	CA	15	P	503.968	0.014647	0.962938	0.945521	0.0174176
B-15-P-PC22	CA	15	P	2192.26	0.014647	0.860793	0.829693	0.0310993
B-15-P-PC22	CA	15	P	1980	0.014647	0.914808	0.572777	0.342031
B-15-P-PC22	CA	15	P	3882.42	0.014647	0.950958	0.516923	0.434035
B-15-P-PC22	CA	15	P	2262.07	0.014647	0.968902	0.979337	-0.0104354
B-15-P-PC22	CA	15	P	2909.47	0.014647	0.885342	0.867062	0.0182799
B-15-P-PC22	CA	15	P	1901	0.014647	0.956369	0.921976	0.0343927
B-15-P-PC22	CA	15	P	1490.31	0.014647	0.970975	0.956184	0.0147904
B-15-P-PC22	CA	15	P	2080.38	0.014647	0.935359	0.846141	0.0892186
B-15-P-PC22	CA	15	P	804.351	0.014647	0.75502	0.845168	-0.0901486
B-15-P-PC22	CA	15	P	641.725	0.014647	0.986821	0.982549	0.00427221
B-15-P-PC22	CA	15	P	1812	0.014647	0.880743	0.939249	-0.0585062
B-15-P-PC22	CA	15	P	1289.64	0.014647	0.920893	0.837239	0.0836537
B-15-P-PC22	CA	15	P	1234.73	0.014647	0.940876	0.937012	0.00386397
B-15-P-PC22	CA	15	P	2174.26	0.014647	0.912288	0.680224	0.232064
B-15-P-PC22	CA	15	P	1974.73	0.014647	0.91492	0.860398	0.0545221
B-15-P-PC22	CA	15	P	2148.13	0.014647	0.885778	0.982226	-0.0964479
B-15-P-PC22	CA	15	P	1019.93	0.014647	0.919196	0.81874	0.100455
B-15-P-PC22	CA	15	P	779.099	0.014647	0.739707	0.668052	0.071655
B-15-P-PC22	CA	15	P	2360.82	0.014647	0.882358	0.572792	0.309566
B-15-P-PC22	CA	15	P	661.395	0.014647	0.759362	0.617986	0.141376
B-15-P-PC22	CA	15	P	2266.61	0.014647	0.945954	0.853274	0.0926797
B-15-P-PC22	CA	15	P	2383.89	0.014647	0.948486	0.906852	0.0416336
B-15-P-PC22	CA	15	P	1973.3	0.014647	0.943748	0.919626	0.0241219
B-15-P-PC22	CA	15	P	3579.92	0.014647	0.977955	0.982316	-0.00436029
B-15-P-PC22	CA	15	P	1922.35	0.014647	0.932129	0.875741	0.0563877
B-15-P-PC22	CA	15	P	1284.84	0.014647	0.893925	0.875974	0.0179506
B-15-P-PC22	CA	15	P	1415.17	0.014647	0.910853	0.606595	0.304257
B-15-P-PC22	CA	15	P	1798.67	0.014647	0.934138	0.916328	0.0178104
B-15-P-PC22	CA	15	P	1798.67	0.014647	0.980788	0.965218	0.0155692
B-15-P-PC22	CA	15	P	1418.68	0.014647	0.85409	0.625132	0.228958
B-15-P-PC22	CA	15	P	3344.47	0.014647	0.878547	0.771859	0.106688
B-15-P-PC22	CA	15	P	1279.17	0.014647	0.945881	0.845092	0.100789
B-15-P-PC22	CA	15	P	781.375	0.014647	0.96246	0.937504	0.0249565
B-15-P-PC22	CA	15	P	956.122	0.014647	0.913081	0.840375	0.0727063
A-16-P-PC91	NA	16	P	2527.69	0.0371599	0.943806	0.950655	-0.00684853
A-16-P-PC91	NA	16	P	1000	0.0371599	0.981493	0.983713	-0.00221949
A-16-P-PC91	NA	16	P	1411.79	0.0371599	0.913231	0.699551	0.21368
A-16-P-PC91	NA	16	P	1351	0.0371599	0.899225	0.862079	0.0371453
A-16-P-PC91	NA	16	P	500.062	0.0371599	0.977324	0.962942	0.0143819
A-16-P-PC91	NA	16	P	1264.88	0.0371599	0.979981	0.980367	-0.000386238
A-16-P-PC91	NA	16	P	612.323	0.0371599	0.971039	0.962428	0.00861128
A-16-P-PC91	NA	16	P	860.61	0.0371599	0.961202	0.962468	-0.00126528
A-16-P-PC91	NA	16	P	1184.77	0.0371599	0.962197	0.917316	0.0448809
A-16-P-PC91	NA	16	P	893.498	0.0371599	0.83755	0.810094	0.0274563
A-16-P-PC91	NA	16	P	536.099	0.0371599	0.938696	0.948269	-0.00957364
A-16-P-PC91	NA	16	P	937.339	0.0371599	0.983696	0.952354	0.0313413
A-16-P-PC91	NA	16	P	588.331	0.0371599	0.871645	0.883964	-0.0123187
A-16-P-PC91	NA	16	P	1155.48	0.0371599	0.910378	0.816389	0.0939884
A-16-P-PC91	NA	16	P	721.041	0.0371599	0.963442	0.838256	0.125186
A-16-P-PC91	NA	16	P	956.04	0.0371599	0.957635	0.973682	-0.0160474
A-16-P-PC91	NA	16	P	1095.33	0.0371599	0.988697	0.984762	0.00393515
A-16-P-PC91	NA	16	P	1320.65	0.0371599	0.70953	0.732586	-0.0230562
A-16-P-PC91	NA	16	P	1497.94	0.0371599	0.759955	0.917243	-0.157288
A-16-P-PC91	NA	16	P	723.235	0.0371599	0.986031	0.998987	-0.0129558
A-16-P-PC91	NA	16	P	1422.48	0.0371599	0.855008	0.875639	-0.0206313
A-16-P-PC91	NA	16	P	811.884	0.0371599	0.87196	0.923391	-0.0514315
A-16-P-PC91	NA	16	P	1095.19	0.0371599	0.877506	0.883987	-0.00648132
A-16-P-PC91	NA	16	P	639.542	0.0371599	0.875577	0.840024	0.0355522
A-16-R-PC92	NA	16	R	1019.38	0.0140093	0.995697	0.907421	0.088276
A-16-R-PC92	NA	16	R	508.696	0.0140093	0.910103	0.857749	0.0523532
A-16-R-PC92	NA	16	R	639.233	0.0140093	0.923549	0.975734	-0.0521858
A-16-R-PC92	NA	16	R	727.274	0.0140093	0.965942	0.931915	0.0340273
A-16-R-PC92	NA	16	R	1100.46	0.0140093	0.935236	0.854664	0.0805718
A-16-R-PC92	NA	16	R	1395.16	0.0140093	0.951667	0.931234	0.0204327
A-16-R-PC92	NA	16	R	1009.14	0.0140093	0.924531	0.858661	0.0658705
A-16-R-PC92	NA	16	R	2255.7	0.0140093	0.972444	0.965585	0.0068587
A-16-R-PC92	NA	16	R	1874.45	0.0140093	0.989679	0.992447	-0.00276724
A-16-R-PC92	NA	16	R	1197.65	0.0140093	0.993992	0.988417	0.00557521
A-16-R-PC92	NA	16	R	721.103	0.0140093	0.990382	0.994602	-0.00421976
A-16-R-PC92	NA	16	R	937.419	0.0140093	0.937767	0.837646	0.100121
A-16-R-PC92	NA	16	R	1035.28	0.0140093	0.896902	0.915765	-0.0188622
A-16-R-PC92	NA	16	R	3369.07	0.0140093	0.809045	0.539639	0.269406
A-16-R-PC92	NA	16	R	1026.26	0.0140093	0.896289	0.873517	0.0227723
A-16-R-PC92	NA	16	R	665.714	0.0140093	0.837549	0.819836	0.0177129
A-16-R-PC92	NA	16	R	863	0.0140093	0.901997	0.821181	0.0808155
A-16-R-PC92	NA	16	R	806	0.0140093	0.748255	0.703531	0.0447245
A-16-B-PC86	NA	16	B	1308.86	0.00651554	0.991107	0.975387	0.0157208
A-16-B-PC86	NA	16	B	937.409	0.00651554	0.911009	0.92988	-0.0188714
A-16-B-PC86	NA	16	B	2123.34	0.00651554	0.943815	0.932626	0.0111894
A-16-B-PC86	NA	16	B	3511.38	0.00651554	0.998344	0.993142	0.00520254
A-16-B-PC86	NA	16	B	1860.73	0.00651554	0.996383	0.984086	0.0122972
A-16-B-PC86	NA	16	B	2337.27	0.00651554	0.98394	0.963465	0.0204749
A-16-B-PC86	NA	16	B	2802.86	0.00651554	0.973393	0.821462	0.151932
A-16-B-PC86	NA	16	B	599.549	0.00651554	0.975459	0.922076	0.053383
A-16-B-PC86	NA	16	B	3030.42	0.00651554	0.979587	0.998492	-0.0189051
A-16-B-PC86	NA	16	B	840.45	0.00651554	0.989264	0.983115	0.00614969
A-16-B-PC86	NA	16	B	2119.57	0.00651554	0.73263	0.532533	0.200097
A-16-B-PC86	NA	16	B	1236.16	0.00651554	0.99722	0.999352	-0.00213175
A-16-B-PC86	NA	16	B	727.266	0.00651554	0.996052	0.963662	0.0323895
A-16-B-PC86	NA	16	B	804.351	0.00651554	1	1	0
A-16-B-PC86	NA	16	B	1434.17	0.00651554	0.765211	0.699205	0.0660056
A-16-B-PC86	NA	16	B	785.314	0.00651554	0.994869	1	-0.00513072
A-16-B-PC86	NA	16	B	1237	0.00651554	0.843003	0.735358	0.107646
A-16-B-PC86	NA	16	B	1304	0.00651554	0.969547	0.974076	-0.00452911
A-16-B-PC86	NA	16	B	2503.42	0.00651554	0.929777	0.815162	0.114615
A-16-B-PC86	NA	16	B	1106.97	0.00651554	0.872941	0.942791	-0.0698495
A-16-B-PC86	NA	16	B	3930.56	0.00651554	0.982038	0.978718	0.00332009
A-16-B-PC86	NA	16	B	2677.27	0.00651554	0.983989	0.994004	-0.0100143
A-16-B-PC86	NA	16	B	1026.25	0.00651554	0.993401	1	-0.00659885
A-16-B-PC86	NA	16	B	1138.97	0.00651554	0.96222	0.609624	0.352595
A-16-B-PC86	NA	16	B	800.622	0.00651554	0.981382	0.996633	-0.015251
A-16-B-PC86	NA	16	B	840.45	0.00651554	0.968753	0.943492	0.0252609
A-16-B-PC86	NA	16	B	1620	0.00651554	0.976309	0.972759	0.00355006
A-16-B-PC86	NA	16	B	791	0.00651554	0.988352	0.979171	0.00918138
A-16-B-PC86	NA	16	B	2174.8	0.00651554	0.981105	0.905983	0.0751221
A-16-B-PC86	NA	16	B	610.84	0.00651554	0.976909	0.963305	0.0136033
A-16-B-PC86	NA	16	B	2046	0.00651554	0.996855	0.988916	0.00793879
A-16-B-PC86	NA	16	B	1072.2	0.00651554	0.994746	0.978788	0.0159575
A-16-F-PC96	NA	16	F	1398.95	0.0209314	0.731931	0.847661	-0.11573
A-17-I-PC67	NA	17	I	2390	0.0027894	0.999117	0.997484	0.00163278
A-17-I-PC67	NA	17	I	1755	0.0027894	0.995079	0.967975	0.0271034
A-17-I-PC70	NA	17	I	3138.56	0.00459137	0.967015	0.948294	0.0187218
A-17-I-PC70	NA	17	I	2247.69	0.00459137	0.906837	0.334673	0.572164
A-17-I-PC70	NA	17	I	1054.4	0.00459137	0.925103	0.783098	0.142005
A-17-I-PC70	NA	17	I	1687.34	0.00459137	0.786856	0.755565	0.0312909
A-17-I-PC70	NA	17	I	1163.5	0.00459137	0.967888	0.987069	-0.0191812
A-17-I-PC70	NA	17	I	847.845	0.00459137	0.89541	0.861851	0.0335582
A-17-I-PC70	NA	17	I	2326.33	0.00459137	0.927084	0.773583	0.153501
A-17-I-PC70	NA	17	I	1460.82	0.00459137	0.796125	0.744122	0.0520029
A-17-I-PC70	NA	17	I	1122.95	0.00459137	0.965804	0.98207	-0.0162663
A-17-I-PC70	NA	17	I	895.984	0.00459137	0.968561	0.91429	0.0542708
A-17-I-PC70	NA	17	I	1137.28	0.00459137	0.888338	0.78999	0.0983474
A-17-I-PC70	NA	17	I	886.039	0.00459137	0.976102	0.982528	-0.006426
A-17-I-PC70	NA	17	I	2011.85	0.00459137	0.966029	0.866224	0.0998055
A-17-I-PC70	NA	17	I	916.279	0.00459137	0.988435	0.994877	-0.0064414
A-17-I-PC70	NA	17	I	3926.05	0.00459137	0.960432	0.690468	0.269965
A-17-I-PC70	NA	17	I	1224.66	0.00459137	0.808859	0.733033	0.0758254
A-17-I-PC70	NA	17	I	2574.5	0.00459137	0.973396	0.899501	0.0738942
A-17-P-PC73	NA	17	P	1996.1	0.0432778	0.960979	0.984414	-0.0234349
A-17-P-PC73	NA	17	P	599.549	0.0432778	0.955436	0.931161	0.0242758
A-17-P-PC73	NA	17	P	1140.9	0.0432778	0.871263	0.942796	-0.071533
A-17-P-PC73	NA	17	P	1697.62	0.0432778	0.892497	0.923913	-0.0314162
A-17-P-PC73	NA	17	P	1592.65	0.0432778	0.918008	0.962024	-0.0440167
A-17-P-PC73	NA	17	P	1122.93	0.0432778	0.916324	0.93527	-0.0189462
A-17-P-PC73	NA	17	P	779.091	0.0432778	0.946612	0.934113	0.0124993
A-17-P-PC73	NA	17	P	1235	0.0432778	0.925046	0.841392	0.0836534
A-17-P-PC73	NA	17	P	887.609	0.0432778	0.913236	0.942029	-0.0287936
A-17-P-PC73	NA	17	P	812.049	0.0432778	0.905371	0.872131	0.0332397
A-17-P-PC73	NA	17	P	1633.63	0.0432778	0.95226	0.954106	-0.00184622
A-17-P-PC73	NA	17	P	617.366	0.0432778	0.903324	0.915571	-0.0122478
A-17-P-PC73	NA	17	P	1281.39	0.0432778	0.916966	0.897614	0.0193519
A-17-P-PC73	NA	17	P	1269.54	0.0432778	0.730194	0.492224	0.23797
A-17-P-PC73	NA	17	P	1352.54	0.0432778	0.9146	0.979992	-0.0653914
A-17-P-PC73	NA	17	P	593.479	0.0432778	0.73575	0.796805	-0.0610547
A-17-P-PC73	NA	17	P	1029.79	0.0432778	0.852776	0.882166	-0.0293903
A-17-P-PC73	NA	17	P	630.338	0.0432778	0.724037	0.468829	0.255208
A-17-P-PC73	NA	17	P	840.45	0.0432778	0.860114	0.900623	-0.0405089
A-17-P-PC73	NA	17	P	1559	0.0432778	0.885275	0.78842	0.0968544
A-17-P-PC73	NA	17	P	1285.48	0.0432778	0.892031	0.821186	0.0708451
A-17-P-PC73	NA	17	P	1932.06	0.0432778	0.753795	0.440308	0.313488
A-17-R-PC76	NA	17	R	1000.59	0.0558331	0.914991	0.829948	0.0850429
A-17-R-PC76	NA	17	R	500.062	0.0558331	0.877026	0.897125	-0.0200993
A-17-R-PC76	NA	17	R	1727.66	0.0558331	0.87358	0.903346	-0.0297658
A-17-R-PC76	NA	17	R	799.416	0.0558331	0.831336	0.81212	0.019216
A-17-R-PC76	NA	17	R	1912.26	0.0558331	0.859325	0.842528	0.0167975
A-17-R-PC76	NA	17	R	561.929	0.0558331	0.832042	0.824822	0.00722014
A-17-R-PC76	NA	17	R	1746	0.0558331	0.864346	0.896163	-0.0318175
A-17-R-PC76	NA	17	R	593.491	0.0558331	0.87205	0.861937	0.0101137
A-17-R-PC76	NA	17	R	1804.64	0.0558331	0.83926	0.910461	-0.0712011
A-17-R-PC76	NA	17	R	2391.06	0.0558331	0.892691	0.965507	-0.0728158
A-17-R-PC76	NA	17	R	1813.16	0.0558331	0.864723	0.837167	0.0275561
A-17-R-PC76	NA	17	R	2748.19	0.0558331	0.894567	0.951274	-0.0567069
A-17-R-PC76	NA	17	R	1054.42	0.0558331	0.893901	0.892907	0.000993326
A-17-R-PC76	NA	17	R	1197.97	0.0558331	0.814801	0.929298	-0.114497
A-17-R-PC76	NA	17	R	2910.28	0.0558331	0.84259	0.944343	-0.101753
A-17-R-PC76	NA	17	R	695.169	0.0558331	0.884737	0.845571	0.0391656
A-17-R-PC76	NA	17	R	1234.72	0.0558331	0.879383	0.896797	-0.0174138
A-17-R-PC76	NA	17	R	639.83	0.0558331	0.823593	0.875278	-0.0516851
A-17-R-PC76	NA	17	R	775.647	0.0558331	0.874148	0.870671	0.00347702
A-17-R-PC76	NA	17	R	1775.22	0.0558331	0.934871	0.830406	0.104465
A-17-R-PC76	NA	17	R	970.866	0.0558331	0.93733	0.851973	0.0853564
A-17-R-PC76	NA	17	R	2788	0.0558331	0.866498	0.608962	0.257535
A-17-R-PC76	NA	17	R	588.375	0.0558331	0.751261	0.525722	0.225539
A-17-B-PC78	NA	17	B	665.706	0.016979	0.946389	0.920219	0.0261703
A-17-B-PC78	NA	17	B	1534.15	0.016979	0.971228	0.966522	0.00470637
A-17-B-PC78	NA	17	B	2272.02	0.016979	0.955726	0.988898	-0.0331725
A-17-B-PC78	NA	17	B	943	0.016979	0.924012	0.798975	0.125037
A-17-B-PC78	NA	17	B	2690.7	0.016979	0.968008	0.914104	0.0539039
A-17-B-PC78	NA	17	B	1110	0.016979	0.951483	0.954352	-0.00286929
A-17-B-PC78	NA	17	B	1591	0.016979	0.973501	0.919239	0.0542616
A-17-B-PC78	NA	17	B	2589	0.016979	0.979983	0.970972	0.00901101
A-17-B-PC78	NA	17	B	923.076	0.016979	0.974057	0.880358	0.0936989
A-17-B-PC78	NA	17	B	500.062	0.016979	0.975317	0.941772	0.0335452
A-17-B-PC78	NA	17	B	538.203	0.016979	0.978666	0.96851	0.0101556
A-17-B-PC78	NA	17	B	1408	0.016979	0.840781	0.929358	-0.0885771
A-17-B-PC78	NA	17	B	896.832	0.016979	0.958521	0.945563	0.0129581
A-17-B-PC78	NA	17	B	1276.03	0.016979	0.965527	0.812048	0.153478
A-17-B-PC78	NA	17	B	1035.27	0.016979	0.981347	0.975073	0.00627346
A-17-B-PC78	NA	17	B	1822.73	0.016979	0.991513	0.995039	-0.00352567
A-17-B-PC78	NA	17	B	2859.3	0.016979	0.994283	0.558646	0.435637
A-17-B-PC78	NA	17	B	1246.6	0.016979	0.989143	0.973866	0.0152765
A-17-B-PC78	NA	17	B	1412.34	0.016979	0.844002	0.784166	0.0598362
A-17-B-PC78	NA	17	B	513.386	0.016979	0.975689	0.984584	-0.00889529
A-17-B-PC78	NA	17	B	641.732	0.016979	0.987998	0.976536	0.011462
A-17-B-PC78	NA	17	B	641.732	0.016979	0.985529	0.987335	-0.00180669
A-17-B-PC78	NA	17	B	1425.26	0.016979	0.968591	0.890716	0.0778749
A-17-B-PC78	NA	17	B	837.096	0.016979	0.990114	0.97943	0.0106847
A-17-B-PC78	NA	17	B	2349.17	0.016979	0.993059	0.97028	0.0227788
A-17-B-PC78	NA	17	B	558.064	0.016979	0.975108	0.675449	0.299659
A-17-B-PC78	NA	17	B	642.746	0.016979	0.750162	0.679362	0.0708002
A-17-B-PC78	NA	17	B	1540.16	0.016979	0.9708	0.949297	0.0215036
A-17-B-PC78	NA	17	B	2405.81	0.016979	0.983354	0.951908	0.0314458
A-17-B-PC78	NA	17	B	500.067	0.016979	0.945643	0.932235	0.013408
A-17-B-PC78	NA	17	B	599.555	0.016979	0.99075	0.985535	0.00521477
A-17-B-PC78	NA	17	B	1096.14	0.016979	1	0.986651	0.0133492
A-17-B-PC78	NA	17	B	895.975	0.016979	0.99563	0.998149	-0.00251894
A-17-B-PC78	NA	17	B	816.817	0.016979	0.975242	0.879667	0.0955752
A-17-B-PC78	NA	17	B	2453.29	0.016979	0.999824	0.985703	0.0141214
A-17-B-PC78	NA	17	B	1769	0.016979	0.869475	0.882275	-0.0128004
A-17-B-PC78	NA	17	B	2139.79	0.016979	0.971225	0.887817	0.0834077
A-17-B-PC78	NA	17	B	880	0.016979	0.919431	0.871591	0.0478395
A-17-B-PC78	NA	17	B	1055	0.016979	0.962722	0.92225	0.0404726
A-17-B-PC78	NA	17	B	707.6	0.016979	0.980005	0.910408	0.0695963
A-17-B-PC78	NA	17	B	641.732	0.016979	0.987584	0.989385	-0.00180095
A-17-B-PC78	NA	17	B	1750.06	0.016979	0.980713	0.920973	0.0597404
A-17-B-PC78	NA	17	B	1863.5	0.016979	0.910859	0.854757	0.0561025
A-17-B-PC78	NA	17	B	1035.28	0.016979	0.990429	0.991509	-0.00108035
A-17-B-PC78	NA	17	B	1234.73	0.016979	0.935479	0.903395	0.0320842
A-17-B-PC78	NA	17	B	3189.53	0.016979	0.98186	0.928712	0.0531482
A-17-B-PC78	NA	17	B	1223.99	0.016979	0.986711	0.904152	0.0825586
A-17-B-PC78	NA	17	B	1223.36	0.016979	0.995583	0.991513	0.00407036
A-17-B-PC78	NA	17	B	863.69	0.016979	0.997032	0.995017	0.00201476
A-17-B-PC78	NA	17	B	2108.43	0.016979	0.937283	0.930273	0.0070107
A-17-B-PC78	NA	17	B	766.951	0.016979	0.893712	0.825025	0.0686877
A-17-B-PC78	NA	17	B	948.006	0.016979	0.723703	0.665101	0.058602
A-17-R-PC80	NA	17	R	968.891	0.0203218	0.986672	0.944041	0.0426306
A-17-R-PC80	NA	17	R	1865.22	0.0203218	0.913642	0.765541	0.148101
A-17-R-PC80	NA	17	R	508.696	0.0203218	0.931683	0.932134	-0.000450734
A-17-R-PC80	NA	17	R	1221.68	0.0203218	0.964291	0.93531	0.0289806
A-17-R-PC80	NA	17	R	1197.63	0.0203218	0.972033	0.979343	-0.00731021
A-17-R-PC80	NA	17	R	970.866	0.0203218	0.987303	0.961263	0.0260405
A-17-R-PC80	NA	17	R	3153.12	0.0203218	0.993945	0.993824	0.000120921
A-17-R-PC80	NA	17	R	593.479	0.0203218	0.978591	0.975318	0.00327316
A-17-R-PC80	NA	17	R	2060.33	0.0203218	0.979715	0.978577	0.00113776
A-17-R-PC80	NA	17	R	937.409	0.0203218	0.975208	0.887709	0.0874984
A-17-R-PC80	NA	17	R	697.572	0.0203218	0.990259	0.893497	0.0967617
A-17-R-PC80	NA	17	R	2612.38	0.0203218	0.994221	0.824717	0.169505
A-17-R-PC80	NA	17	R	956.112	0.0203218	0.986948	0.985254	0.00169399
A-17-R-PC80	NA	17	R	1000.59	0.0203218	0.988075	0.979457	0.00861864
A-17-R-PC80	NA	17	R	1164.9	0.0203218	0.986934	0.999516	-0.012582
A-17-R-PC80	NA	17	R	1058.12	0.0203218	0.927512	0.913328	0.0141839
A-17-R-PC80	NA	17	R	1174.57	0.0203218	0.979457	0.980209	-0.000751272
A-17-R-PC80	NA	17	R	1659.88	0.0203218	0.987034	0.972224	0.0148103
A-17-R-PC80	NA	17	R	1789.94	0.0203218	0.884507	0.705074	0.179433
A-17-R-PC80	NA	17	R	1554.5	0.0203218	0.990565	0.976843	0.0137218
A-17-R-PC80	NA	17	R	3666.13	0.0203218	0.974998	0.959215	0.0157833
A-17-R-PC80	NA	17	R	876.955	0.0203218	0.992024	0.992112	-8.77428e-05
A-17-R-PC80	NA	17	R	2472.33	0.0203218	0.769933	0.693316	0.076617
A-17-R-PC80	NA	17	R	2472.33	0.0203218	0.864034	0.685533	0.178501
A-17-R-PC80	NA	17	R	1197.63	0.0203218	0.899345	0.976912	-0.0775669
A-17-R-PC80	NA	17	R	2336.61	0.0203218	0.987752	0.995884	-0.00813209
A-17-R-PC80	NA	17	R	1093.72	0.0203218	0.941772	0.892142	0.0496304
A-17-R-PC80	NA	17	R	1405.53	0.0203218	0.917387	0.932131	-0.0147435
A-17-R-PC80	NA	17	R	1832.4	0.0203218	0.984752	0.984142	0.000609389
A-17-R-PC80	NA	17	R	582.449	0.0203218	0.993181	0.98076	0.0124208
A-17-R-PC80	NA	17	R	1557.87	0.0203218	0.868035	0.744734	0.123301
A-17-R-PC80	NA	17	R	610.84	0.0203218	0.992731	0.990154	0.00257751
A-18-R-PC52	NA	18	R	3913.23	0.0244718	0.922641	0.895143	0.0274978
A-18-R-PC52	NA	18	R	896.832	0.0244718	0.956245	0.925283	0.0309617
A-18-R-PC52	NA	18	R	1019.92	0.0244718	0.937185	0.981493	-0.044308
A-18-R-PC52	NA	18	R	2349.14	0.0244718	0.84941	0.911312	-0.0619024
A-18-R-PC52	NA	18	R	1772.92	0.0244718	0.990085	0.986755	0.00333016
A-18-R-PC52	NA	18	R	2598.38	0.0244718	0.940474	0.953243	-0.0127686
A-18-R-PC52	NA	18	R	1680.9	0.0244718	0.919973	0.830012	0.089961
A-18-R-PC52	NA	18	R	1047.09	0.0244718	0.902976	0.915364	-0.0123878
A-18-R-PC52	NA	18	R	875	0.0244718	0.934976	0.758384	0.176592
A-18-R-PC52	NA	18	R	2734.1	0.0244718	0.877088	0.737939	0.139149
A-18-R-PC52	NA	18	R	599.549	0.0244718	0.958748	0.927415	0.0313335
A-18-R-PC52	NA	18	R	779.499	0.0244718	0.883141	0.825509	0.0576317
A-18-R-PC52	NA	18	R	1000	0.0244718	0.974361	0.891604	0.0827568
A-18-R-PC52	NA	18	R	1063.99	0.0244718	0.947039	0.842419	0.10462
A-18-R-PC52	NA	18	R	665.706	0.0244718	0.936887	0.937997	-0.00110938
A-18-R-PC52	NA	18	R	776	0.0244718	0.94778	0.877587	0.0701927
A-18-R-PC52	NA	18	R	558.409	0.0244718	0.841133	0.782053	0.0590807
A-18-R-PC52	NA	18	R	779.091	0.0244718	0.916838	0.833063	0.0837752
A-18-R-PC52	NA	18	R	1017.39	0.0244718	0.867973	0.777565	0.0904077
A-18-R-PC52	NA	18	R	2987.14	0.0244718	0.959478	0.952481	0.00699742
A-18-R-PC52	NA	18	R	1790	0.0244718	0.918297	0.95471	-0.0364122
A-18-R-PC52	NA	18	R	1851.82	0.0244718	0.841535	0.850661	-0.00912654
A-18-R-PC52	NA	18	R	1922.32	0.0244718	0.909386	0.935749	-0.0263633
A-18-R-PC52	NA	18	R	2254.17	0.0244718	0.816578	0.509653	0.306925
A-18-R-PC52	NA	18	R	3459.28	0.0244718	0.929859	0.680268	0.24959
A-18-R-PC52	NA	18	R	779.499	0.0244718	0.860836	0.715264	0.145572
A-18-R-PC52	NA	18	R	2233.64	0.0244718	0.848214	0.587393	0.260821
A-18-R-PC52	NA	18	R	1614.61	0.0244718	0.929441	0.836574	0.0928666
A-18-R-PC52	NA	18	R	2947.39	0.0244718	0.917277	0.706526	0.210751
A-18-R-PC52	NA	18	R	513.38	0.0244718	0.931659	0.886844	0.044815
A-18-R-PC52	NA	18	R	1991.38	0.0244718	0.978788	0.992971	-0.0141827
A-18-R-PC52	NA	18	R	1417.16	0.0244718	0.933147	0.9119	0.021247
A-18-R-PC52	NA	18	R	1725.16	0.0244718	0.944494	0.954672	-0.0101777
A-18-R-PC52	NA	18	R	4032	0.0244718	0.935731	0.829798	0.105933
A-18-R-PC52	NA	18	R	2527.69	0.0244718	0.700679	0.558617	0.142062
A-18-R-PC52	NA	18	R	1289.64	0.0244718	0.735394	0.649412	0.0859813
A-18-R-PC52	NA	18	R	966.029	0.0244718	0.712966	0.667946	0.0450202
A-18-R-PC52	NA	18	R	3551.55	0.0244718	0.742262	0.487846	0.254415
A-18-P-PC55	NA	18	P	1011	0.0499457	0.904102	0.904102	-1.37582e-07
A-18-P-PC55	NA	18	P	1631.67	0.0499457	0.845336	0.904671	-0.0593358
A-18-P-PC55	NA	18	P	582.468	0.0499457	0.872488	0.881478	-0.00898988
A-18-P-PC55	NA	18	P	1211.14	0.0499457	0.781084	0.816634	-0.0355495
A-18-P-PC55	NA	18	P	923.076	0.0499457	0.842253	0.910844	-0.0685915
A-18-P-PC55	NA	18	P	527.062	0.0499457	0.845313	0.893347	-0.048034
A-18-P-PC55	NA	18	P	775.647	0.0499457	0.820395	0.923887	-0.103492
A-18-P-PC55	NA	18	P	943.087	0.0499457	0.816669	0.704998	0.111671
A-18-P-PC55	NA	18	P	558.112	0.0499457	0.924564	0.910109	0.0144551
A-18-P-PC55	NA	18	P	1370	0.0499457	0.853711	0.966972	-0.113261
A-18-P-PC55	NA	18	P	1300	0.0499457	0.919832	0.975753	-0.0559211
A-18-P-PC55	NA	18	P	508.745	0.0499457	0.874944	0.910835	-0.0358912
A-18-P-PC55	NA	18	P	516.702	0.0499457	0.823486	0.819382	0.00410358
A-18-P-PC55	NA	18	P	779.166	0.0499457	0.907439	0.899744	0.00769563
A-18-P-PC55	NA	18	P	2655.88	0.0499457	0.860257	0.775848	0.0844093
A-18-P-PC55	NA	18	P	3136.03	0.0499457	0.878951	0.910074	-0.0311233
A-18-P-PC55	NA	18	P	918.615	0.0499457	0.877724	0.915304	-0.03758
A-18-P-PC55	NA	18	P	1559.02	0.0499457	0.88299	0.873764	0.00922542
A-18-P-PC55	NA	18	P	887.609	0.0499457	0.89782	0.727347	0.170474
A-18-P-PC55	NA	18	P	602	0.0499457	0.883794	0.919463	-0.0356689
A-18-P-PC55	NA	18	P	1430	0.0499457	0.869262	0.663604	0.205658
A-18-P-PC55	NA	18	P	1412.34	0.0499457	0.939743	0.925893	0.0138492
A-18-P-PC55	NA	18	P	1054.12	0.0499457	0.886638	0.91365	-0.0270122
A-18-P-PC55	NA	18	P	861.237	0.0499457	0.70866	0.582708	0.125953
A-18-I-PC58	NA	18	I	1846.15	0.00111431	0.976938	0.944027	0.0329112
A-18-I-PC58	NA	18	I	1682.44	0.00111431	0.969249	0.952986	0.0162637
A-18-I-PC58	NA	18	I	2856.27	0.00111431	0.833594	0.572693	0.2609
A-18-I-PC58	NA	18	I	1891.57	0.00111431	0.986682	0.997882	-0.0111998
A-18-I-PC58	NA	18	I	1759.71	0.00111431	0.965921	0.974473	-0.00855203
A-18-B-PC61	NA	18	B	918.605	0.00767494	0.8964	0.802176	0.0942246
A-18-B-PC61	NA	18	B	2261	0.00767494	0.980911	0.9874	-0.00648882
A-18-B-PC61	NA	18	B	1978	0.00767494	0.991943	0.985022	0.00692087
A-18-B-PC61	NA	18	B	770.07	0.00767494	0.883887	0.766732	0.117154
A-18-B-PC61	NA	18	B	728.6	0.00767494	0.7822	0.583077	0.199123
A-18-B-PC61	NA	18	B	3053	0.00767494	0.894567	0.782505	0.112062
A-18-B-PC61	NA	18	B	1050	0.00767494	0.930535	0.540728	0.389807
A-18-B-PC61	NA	18	B	3704.09	0.00767494	0.837235	0.474669	0.362567
A-18-B-PC61	NA	18	B	1936.66	0.00767494	0.956822	0.865682	0.09114
A-18-B-PC61	NA	18	B	2099.63	0.00767494	0.851655	0.723756	0.1279
A-18-B-PC61	NA	18	B	1922.42	0.00767494	0.799982	0.555842	0.24414
A-18-B-PC61	NA	18	B	3213.69	0.00767494	0.88919	0.831157	0.0580332
A-18-B-PC61	NA	18	B	721.931	0.00767494	0.984587	0.976321	0.0082667
A-18-B-PC61	NA	18	B	1522.63	0.00767494	0.955101	0.992167	-0.0370667
A-18-B-PC61	NA	18	B	1719.83	0.00767494	0.891587	0.621266	0.270321
A-18-B-PC61	NA	18	B	779.099	0.00767494	0.990136	0.989837	0.000299605
A-18-B-PC61	NA	18	B	617.366	0.00767494	0.782325	0.698665	0.0836593
A-18-B-PC61	NA	18	B	1481.89	0.00767494	0.783702	0.938462	-0.15476
A-18-B-PC61	NA	18	B	1254	0.00767494	0.933983	0.58189	0.352093
A-18-B-PC61	NA	18	B	2388	0.00767494	0.956138	0.651077	0.305061
A-18-B-PC61	NA	18	B	1633.67	0.00767494	0.933029	0.81179	0.121239
A-18-B-PC61	NA	18	B	617.366	0.00767494	0.959078	0.89041	0.0686683
A-18-B-PC61	NA	18	B	2336.63	0.00767494	0.94906	0.932144	0.0169154
A-18-B-PC61	NA	18	B	1262	0.00767494	0.984909	0.79022	0.194689
A-18-B-PC61	NA	18	B	4877.16	0.00767494	0.93339	0.932997	0.000393081
A-18-B-PC61	NA	18	B	1991	0.00767494	0.929778	0.771747	0.158031
A-18-B-PC61	NA	18	B	1904	0.00767494	0.699545	0.454201	0.245344
A-18-B-PC61	NA	18	B	2107.92	0.00767494	0.94863	0.795348	0.153282
A-18-B-PC61	NA	18	B	1607.51	0.00767494	0.966177	0.840049	0.126127
A-18-B-PC61	NA	18	B	2385.21	0.00767494	0.89712	0.69479	0.20233
A-18-B-PC61	NA	18	B	1953.38	0.00767494	0.838348	0.807541	0.0308077
A-18-B-PC61	NA	18	B	1887.4	0.00767494	0.980093	0.897571	0.0825224
A-18-B-PC61	NA	18	B	840.459	0.00767494	0.98907	0.894122	0.0949479
A-18-B-PC61	NA	18	B	631.453	0.00767494	0.962684	0.958763	0.00392105
A-18-B-PC61	NA	18	B	1260.69	0.00767494	0.858535	0.76822	0.0903153
A-18-B-PC61	NA	18	B	799.407	0.00767494	0.949904	0.871106	0.0787974
A-18-B-PC61	NA	18	B	1443.88	0.00767494	0.900495	0.698158	0.202337
A-18-B-PC61	NA	18	B	548.072	0.00767494	0.864089	0.713876	0.150213
A-18-B-PC61	NA	18	B	3326.44	0.00767494	0.936701	0.909002	0.0276992
A-18-B-PC61	NA	18	B	1948.81	0.00767494	0.962466	0.806525	0.155941
A-18-B-PC61	NA	18	B	770.078	0.00767494	0.9293	0.754385	0.174915
A-18-B-PC61	NA	18	B	1139.65	0.00767494	0.960582	0.905369	0.0552131
A-18-B-PC61	NA	18	B	1058.13	0.00767494	0.939788	0.733775	0.206013
A-18-B-PC61	NA	18	B	1864.05	0.00767494	0.979894	0.99557	-0.0156764
A-18-B-PC61	NA	18	B	2292.14	0.00767494	0.909138	0.774845	0.134293
A-18-B-PC61	NA	18	B	1708.16	0.00767494	0.845615	0.723029	0.122587
A-18-B-PC61	NA	18	B	3186	0.00767494	0.817856	0.522826	0.295029
A-18-B-PC61	NA	18	B	2759.49	0.00767494	0.984007	0.951861	0.0321456
A-18-F-PC64	NA	18	F	3004.88	0.00323618	0.838769	0.709619	0.12915
A-18-F-PC64	NA	18	F	2355.94	0.00323618	0.906662	0.93588	-0.0292179
A-18-F-PC64	NA	18	F	2406.49	0.00323618	0.996871	0.982582	0.0142886
A-18-F-PC64	NA	18	F	968.291	0.00323618	0.923933	0.972699	-0.0487659
A-18-F-PC64	NA	18	F	2283.4	0.00323618	0.947222	0.862439	0.0847824
A-18-F-PC64	NA	18	F	779.091	0.00323618	0.986902	0.988231	-0.0013287
D-19-P-PC97	MW	19	P	925	0.037694	0.989079	0.991536	-0.00245698
D-19-P-PC97	MW	19	P	594	0.037694	0.971702	0.703946	0.267755
D-19-P-PC97	MW	19	P	523.543	0.037694	0.900076	0.944444	-0.0443678
D-19-P-PC97	MW	19	P	508.696	0.037694	0.872404	0.790529	0.0818751
D-19-P-PC97	MW	19	P	695.177	0.037694	0.922803	0.91195	0.0108524
D-19-P-PC97	MW	19	P	3248.26	0.037694	0.939877	0.89618	0.0436965
D-19-P-PC97	MW	19	P	867	0.037694	0.855998	0.792974	0.063024
D-19-P-PC97	MW	19	P	775	0.037694	0.855152	0.58898	0.266173
D-19-P-PC97	MW	19	P	2283.43	0.037694	0.890884	0.930088	-0.0392041
D-19-P-PC97	MW	19	P	500.067	0.037694	0.912197	0.937067	-0.0248693
D-19-P-PC97	MW	19	P	756.67	0.037694	0.878743	0.812825	0.0659177
D-19-P-PC97	MW	19	P	1101	0.037694	0.986569	0.947733	0.0388359
D-19-P-PC97	MW	19	P	1116.83	0.037694	0.865973	0.851805	0.014168
D-19-P-PC97	MW	19	P	714.806	0.037694	0.884061	0.880501	0.00355993
D-19-P-PC97	MW	19	P	1084.93	0.037694	0.919985	0.888088	0.0318976
D-19-P-PC97	MW	19	P	812.058	0.037694	0.932085	0.92719	0.00489504
D-19-P-PC97	MW	19	P	727.274	0.037694	0.851765	0.740345	0.11142
D-19-P-PC97	MW	19	P	1178.32	0.037694	0.86863	0.713889	0.15474
D-19-P-PC97	MW	19	P	1155.57	0.037694	0.899656	0.863586	0.0360695
D-19-P-PC97	MW	19	P	756.67	0.037694	0.889902	0.826499	0.063403
D-19-P-PC97	MW	19	P	599.555	0.037694	0.825153	0.870843	-0.0456896
D-19-P-PC97	MW	19	P	538.208	0.037694	0.915657	0.846343	0.0693139
D-19-P-PC97	MW	19	P	2633.44	0.037694	0.9171	0.692493	0.224607
D-19-P-PC97	MW	19	P	1592.67	0.037694	0.880799	0.684785	0.196014
D-19-P-PC97	MW	19	P	593.485	0.037694	0.829998	0.772612	0.0573867
D-19-P-PC97	MW	19	P	508.702	0.037694	0.802238	0.788998	0.0132394
D-19-P-PC97	MW	19	P	785.323	0.037694	0.8284	0.779117	0.0492834
D-19-P-PC97	MW	19	P	2887.75	0.037694	0.945644	0.827533	0.118111
D-19-P-PC97	MW	19	P	727.274	0.037694	0.844039	0.91815	-0.0741111
D-19-P-PC97	MW	19	P	662.737	0.037694	0.917589	0.916854	0.000735432
D-19-P-PC97	MW	19	P	1110.12	0.037694	0.876379	0.797342	0.0790373
D-19-P-PC97	MW	19	P	1137.39	0.037694	0.908337	0.83965	0.0686875
D-19-P-PC97	MW	19	P	1386.83	0.037694	0.922488	0.905888	0.0166002
D-19-P-PC97	MW	19	P	2579.32	0.037694	0.851299	0.937214	-0.0859158
D-19-P-PC97	MW	19	P	661.395	0.037694	0.952819	0.918887	0.0339316
D-19-P-PC97	MW	19	P	558.064	0.037694	0.797405	0.781398	0.0160066
D-19-P-PC97	MW	19	P	1109.52	0.037694	0.905609	0.848801	0.0568082
D-19-P-PC97	MW	19	P	2302.83	0.037694	0.893079	0.843103	0.0499763
D-19-P-PC97	MW	19	P	1016.27	0.037694	0.877552	0.868393	0.00915875
D-19-P-PC97	MW	19	P	631.453	0.037694	0.886497	0.882543	0.00395385
D-19-P-PC97	MW	19	P	1139.65	0.037694	0.858219	0.831419	0.0268007
D-19-P-PC97	MW	19	P	767.083	0.037694	0.837957	0.879858	-0.041901
D-19-P-PC97	MW	19	P	3123.85	0.037694	0.970219	0.900606	0.0696131
D-19-R-PC100	MW	19	R	799.398	0.0454545	0.943033	0.933401	0.00963279
D-19-R-PC100	MW	19	R	1799.72	0.0454545	0.858195	0.676259	0.181936
D-19-R-PC100	MW	19	R	1116.82	0.0454545	0.867737	0.913502	-0.0457646
D-19-R-PC100	MW	19	R	1945.45	0.0454545	0.965041	0.957753	0.00728835
D-19-R-PC100	MW	19	R	2662.57	0.0454545	0.842316	0.686307	0.156009
D-19-R-PC100	MW	19	R	1139.53	0.0454545	0.908262	0.902984	0.00527863
D-19-R-PC100	MW	19	R	1300	0.0454545	0.875508	0.579665	0.295843
D-19-R-PC100	MW	19	R	1223.57	0.0454545	0.919303	0.944452	-0.0251493
D-19-R-PC100	MW	19	R	727.274	0.0454545	0.939136	0.918039	0.0210977
D-19-R-PC100	MW	19	R	956.122	0.0454545	0.851936	0.911084	-0.0591481
D-19-R-PC100	MW	19	R	887.618	0.0454545	0.947264	0.944493	0.00277091
D-19-R-PC100	MW	19	R	1066.41	0.0454545	0.963403	0.967297	-0.00389356
D-19-R-PC100	MW	19	R	671.488	0.0454545	0.920575	0.905254	0.0153208
D-19-R-PC100	MW	19	R	631.453	0.0454545	0.827127	0.628384	0.198742
D-19-R-PC100	MW	19	R	2409.72	0.0454545	0.954524	0.95212	0.00240409
D-19-R-PC100	MW	19	R	1169.26	0.0454545	0.948766	0.799924	0.148843
D-19-R-PC100	MW	19	R	1155.12	0.0454545	0.945043	0.869465	0.075578
D-19-R-PC100	MW	19	R	1101	0.0454545	0.908079	0.859107	0.0489714
D-19-R-PC100	MW	19	R	1354	0.0454545	0.885909	0.917052	-0.0311434
D-19-R-PC100	MW	19	R	1074.91	0.0454545	0.911227	0.848046	0.0631815
D-19-R-PC100	MW	19	R	1628	0.0454545	0.889828	0.49277	0.397058
D-19-R-PC100	MW	19	R	3015	0.0454545	0.963535	0.963489	4.59562e-05
D-19-R-PC100	MW	19	R	852	0.0454545	0.897116	0.488089	0.409028
D-19-R-PC100	MW	19	R	3467.18	0.0454545	0.942149	0.940659	0.00148955
D-19-R-PC100	MW	19	R	779.499	0.0454545	0.916094	0.842741	0.0733528
D-19-R-PC100	MW	19	R	536.099	0.0454545	0.875677	0.926049	-0.0503719
D-19-R-PC100	MW	19	R	1236.16	0.0454545	0.931267	0.939041	-0.0077735
D-19-I-PC103	MW	19	I	4828.05	0.00580222	0.869884	0.548397	0.321487
D-19-I-PC103	MW	19	I	2928.48	0.00580222	0.94846	0.886256	0.0622037
D-19-I-PC103	MW	19	I	863.829	0.00580222	0.984422	0.950193	0.034229
D-19-I-PC103	MW	19	I	3670.66	0.00580222	0.829404	0.586579	0.242825
D-19-I-PC103	MW	19	I	3150.84	0.00580222	0.962608	0.8767	0.0859071
D-19-I-PC103	MW	19	I	1302.23	0.00580222	0.986797	0.878378	0.108419
D-19-I-PC103	MW	19	I	909.824	0.00580222	0.996357	0.978107	0.0182491
D-19-I-PC103	MW	19	I	695.169	0.00580222	0.924575	0.940232	-0.0156574
D-19-I-PC103	MW	19	I	4125.23	0.00580222	0.978084	0.903277	0.0748061
D-19-I-PC103	MW	19	I	2655.66	0.00580222	0.946287	0.88167	0.0646167
D-19-I-PC103	MW	19	I	599.555	0.00580222	0.898436	0.849555	0.0488806
D-19-I-PC103	MW	19	I	4310.48	0.00580222	0.935376	0.981157	-0.045781
D-19-I-PC103	MW	19	I	2584.5	0.00580222	0.930734	0.665444	0.265291
D-19-I-PC103	MW	19	I	1895.21	0.00580222	0.919783	0.788835	0.130948
D-19-I-PC103	MW	19	I	3489.66	0.00580222	0.906301	0.794005	0.112297
D-19-I-PC103	MW	19	I	3074.91	0.00580222	0.966622	0.822601	0.144022
D-19-I-PC103	MW	19	I	3278.27	0.00580222	0.921389	0.87361	0.0477792
D-19-I-PC103	MW	19	I	1690.98	0.00580222	0.953255	0.888438	0.0648174
D-19-F-PC106	MW	19	F	4380.79	0.027573	0.898722	0.756492	0.14223
D-19-F-PC106	MW	19	F	1490.31	0.027573	0.934143	0.827611	0.106532
D-19-F-PC106	MW	19	F	3827.37	0.027573	0.930015	0.664949	0.265066
D-19-F-PC106	MW	19	F	3061	0.027573	0.930707	0.777237	0.15347
D-19-F-PC106	MW	19	F	4178.09	0.027573	0.904995	0.900368	0.0046264
D-19-F-PC106	MW	19	F	1677	0.027573	0.767583	0.56747	0.200113
D-19-F-PC106	MW	19	F	1235	0.027573	0.887316	0.967122	-0.0798061
D-19-F-PC106	MW	19	F	4232.03	0.027573	0.927436	0.968258	-0.0408222
D-19-F-PC106	MW	19	F	2649.88	0.027573	0.87796	0.588334	0.289626
D-19-F-PC106	MW	19	F	3041	0.027573	0.904138	0.898362	0.00577595
D-19-F-PC106	MW	19	F	1626	0.027573	0.816178	0.615202	0.200976
D-19-F-PC106	MW	19	F	1005	0.027573	0.899819	0.948669	-0.04885
D-19-F-PC106	MW	19	F	1946	0.027573	0.897461	0.912865	-0.0154037
D-19-F-PC106	MW	19	F	2000.25	0.027573	0.951593	0.612214	0.339379
D-19-F-PC106	MW	19	F	1945	0.027573	0.934012	0.95852	-0.0245079
D-19-F-PC106	MW	19	F	1624	0.027573	0.91719	0.862761	0.0544287
D-19-F-PC106	MW	19	F	1953	0.027573	0.938201	0.977989	-0.0397873
D-19-F-PC106	MW	19	F	3029.63	0.027573	0.807557	0.732406	0.0751508
D-19-F-PC106	MW	19	F	1558.95	0.027573	0.896812	0.913563	-0.0167512
D-19-F-PC106	MW	19	F	1633.62	0.027573	0.911384	0.694895	0.216489
D-19-F-PC106	MW	19	F	1109.49	0.027573	0.901145	0.948712	-0.047567
D-19-F-PC106	MW	19	F	3917.94	0.027573	0.922382	0.867848	0.0545338
D-19-F-PC106	MW	19	F	2697.85	0.027573	0.940309	0.835137	0.105172
D-19-F-PC106	MW	19	F	558.064	0.027573	0.909021	0.928123	-0.0191018
D-19-F-PC106	MW	19	F	1371.9	0.027573	0.885366	0.902852	-0.0174859
D-19-F-PC106	MW	19	F	593.642	0.027573	0.89952	0.744005	0.155515
D-19-F-PC106	MW	19	F	1953.22	0.027573	0.872732	0.869644	0.00308813
D-19-F-PC106	MW	19	F	1781.65	0.027573	0.820371	0.768339	0.0520312
D-19-F-PC106	MW	19	F	2290	0.027573	0.866565	0.896304	-0.0297391
D-19-F-PC106	MW	19	F	1874	0.027573	0.717547	0.642393	0.0751543
D-19-F-PC106	MW	19	F	1961.97	0.027573	0.893199	0.727098	0.166101
D-19-F-PC106	MW	19	F	1494.49	0.027573	0.897437	0.828682	0.0687551
D-19-F-PC106	MW	19	F	1560.96	0.027573	0.879502	0.593883	0.28562
D-19-F-PC106	MW	19	F	2628.59	0.027573	0.800828	0.794591	0.00623701
D-19-F-PC106	MW	19	F	1516.66	0.027573	0.859193	0.94955	-0.0903565
D-19-B-PC109	MW	19	B	1398.95	0.046228	0.958969	0.96314	-0.00417158
D-19-B-PC109	MW	19	B	2152.81	0.046228	0.948149	0.963882	-0.0157332
D-19-B-PC109	MW	19	B	721.931	0.046228	0.928923	0.891251	0.0376724
D-19-B-PC109	MW	19	B	593.636	0.046228	0.927101	0.884768	0.0423322
D-19-B-PC109	MW	19	B	1860.49	0.046228	0.796587	0.830148	-0.0335614
D-19-B-PC109	MW	19	B	2122.17	0.046228	0.932125	0.945479	-0.0133539
D-19-B-PC109	MW	19	B	1348.6	0.046228	0.790079	0.746341	0.0437379
D-19-B-PC109	MW	19	B	2149.82	0.046228	0.887735	0.768837	0.118898
D-19-B-PC109	MW	19	B	1035.28	0.046228	0.896569	0.865458	0.0311101
D-19-B-PC109	MW	19	B	763.052	0.046228	0.909132	0.775474	0.133658
D-19-B-PC109	MW	19	B	548.072	0.046228	0.92208	0.838494	0.0835863
D-19-B-PC109	MW	19	B	1559.02	0.046228	0.822101	0.954973	-0.132872
D-19-B-PC109	MW	19	B	1200	0.046228	0.930367	0.893522	0.0368454
D-19-B-PC109	MW	19	B	1000	0.046228	0.812674	0.796292	0.0163824
D-19-B-PC109	MW	19	B	1508.33	0.046228	0.890199	0.708521	0.181678
D-19-B-PC109	MW	19	B	1685.87	0.046228	0.928082	0.657197	0.270885
D-19-B-PC109	MW	19	B	1155.59	0.046228	0.977926	0.964702	0.013224
D-19-B-PC109	MW	19	B	1481.9	0.046228	0.948521	0.919965	0.0285557
D-19-B-PC109	MW	19	B	1050.59	0.046228	0.904218	0.909967	-0.00574941
D-19-B-PC109	MW	19	B	582.461	0.046228	0.851227	0.885087	-0.0338602
D-19-B-PC109	MW	19	B	661.402	0.046228	0.832986	0.868718	-0.0357321
D-19-B-PC109	MW	19	B	1255.52	0.046228	0.848751	0.803753	0.0449982
D-19-B-PC109	MW	19	B	1035.18	0.046228	0.940594	0.901353	0.0392408
D-19-B-PC109	MW	19	B	943	0.046228	0.896498	0.714689	0.181809
D-19-B-PC109	MW	19	B	1226	0.046228	0.929251	0.849019	0.0802317
D-19-B-PC109	MW	19	B	970.783	0.046228	0.83226	0.710385	0.121875
D-19-B-PC109	MW	19	B	1217.94	0.046228	0.901991	0.864582	0.037409
D-19-B-PC109	MW	19	B	2531.49	0.046228	0.903729	0.890977	0.0127518
D-19-B-PC109	MW	19	B	723.165	0.046228	0.835058	0.80313	0.0319286
D-19-B-PC109	MW	19	B	665.649	0.046228	0.93534	0.849954	0.0853867
D-19-B-PC109	MW	19	B	508.652	0.046228	0.779732	0.902241	-0.122509
D-19-B-PC109	MW	19	B	1360.67	0.046228	0.910453	0.729681	0.180772
D-19-B-PC109	MW	19	B	763.044	0.046228	0.931658	0.808946	0.122711
D-19-B-PC109	MW	19	B	911.366	0.046228	0.883031	0.858213	0.0248189
D-19-B-PC109	MW	19	B	1516.36	0.046228	0.79917	0.789004	0.0101666
D-19-B-PC109	MW	19	B	1293.27	0.046228	0.830405	0.702939	0.127466
D-19-B-PC109	MW	19	B	1124	0.046228	0.898842	0.639151	0.259691
D-19-B-PC109	MW	19	B	737.652	0.046228	0.855928	0.632174	0.223754
D-19-B-PC109	MW	19	B	976.601	0.046228	0.813041	0.626486	0.186555
D-19-R-PC132	MW	19	R	2107.84	0.0436847	0.951642	0.924488	0.0271537
D-19-R-PC132	MW	19	R	610.84	0.0436847	0.898615	0.872077	0.0265382
D-19-R-PC132	MW	19	R	895.965	0.0436847	0.92434	0.762067	0.162273
D-19-R-PC132	MW	19	R	1155.56	0.0436847	0.906125	0.727436	0.178689
D-19-R-PC132	MW	19	R	2998.16	0.0436847	0.979139	0.999386	-0.0202468
D-19-R-PC132	MW	19	R	2346.6	0.0436847	0.882058	0.683677	0.198381
D-19-R-PC132	MW	19	R	723.328	0.0436847	0.941493	0.85478	0.0867125
D-19-R-PC132	MW	19	R	2025.27	0.0436847	0.94885	0.960453	-0.0116028
D-19-R-PC132	MW	19	R	1581.43	0.0436847	0.939576	0.947078	-0.00750147
D-19-R-PC132	MW	19	R	500	0.0436847	0.916651	0.968147	-0.0514967
D-19-R-PC132	MW	19	R	1308.33	0.0436847	0.877126	0.917956	-0.0408297
D-19-R-PC132	MW	19	R	1082	0.0436847	0.926711	0.928869	-0.00215842
D-19-R-PC132	MW	19	R	1434.18	0.0436847	0.906635	0.880353	0.0262825
D-19-R-PC132	MW	19	R	617.366	0.0436847	0.947931	0.941649	0.00628173
D-19-R-PC132	MW	19	R	548.072	0.0436847	0.836961	0.896195	-0.0592335
D-19-R-PC132	MW	19	R	850.285	0.0436847	0.930542	0.920109	0.0104328
D-19-R-PC132	MW	19	R	1770.44	0.0436847	0.947113	0.88083	0.066283
D-19-R-PC132	MW	19	R	637	0.0436847	0.974551	0.964798	0.00975344
D-19-R-PC132	MW	19	R	558.385	0.0436847	0.958462	0.95989	-0.00142746
D-19-R-PC132	MW	19	R	582.424	0.0436847	0.84209	0.814569	0.0275215
D-19-R-PC132	MW	19	R	642.711	0.0436847	0.932756	0.929666	0.0030908
D-19-R-PC132	MW	19	R	969.807	0.0436847	0.978183	0.971872	0.00631049
D-19-R-PC132	MW	19	R	610.846	0.0436847	0.74443	0.792134	-0.0477036
D-19-R-PC132	MW	19	R	1000.6	0.0436847	0.902919	0.822202	0.0807171
D-19-R-PC132	MW	19	R	847.836	0.0436847	0.914151	0.944071	-0.0299202
D-19-R-PC132	MW	19	R	2431.44	0.0436847	0.931326	0.911499	0.019827
D-19-R-PC132	MW	19	R	727.274	0.0436847	0.944412	0.893538	0.050874
D-19-R-PC132	MW	19	R	500.067	0.0436847	0.702995	0.658772	0.0442232
D-19-R-PC132	MW	19	R	721.103	0.0436847	0.967394	0.957443	0.00995088
D-19-R-PC132	MW	19	R	799.407	0.0436847	0.750464	0.858775	-0.10831
D-19-R-PC132	MW	19	R	1308.16	0.0436847	0.821914	0.588258	0.233656
D-19-R-PC132	MW	19	R	1325.47	0.0436847	0.911741	0.720867	0.190873
D-19-R-PC132	MW	19	R	781.375	0.0436847	0.838651	0.618491	0.220161
D-19-R-PC132	MW	19	R	3342.87	0.0436847	0.904609	0.696004	0.208605
D-19-R-PC132	MW	19	R	839.963	0.0436847	0.819234	0.80276	0.0164743
D-19-R-PC132	MW	19	R	500.041	0.0436847	0.940482	0.919213	0.0212697
D-19-R-PC132	MW	19	R	767.041	0.0436847	0.950311	0.895372	0.0549389
D-19-R-PC132	MW	19	R	2069.5	0.0436847	0.874572	0.919492	-0.0449201
D-19-R-PC132	MW	19	R	2244.44	0.0436847	0.827301	0.754909	0.0723918
D-19-R-PC132	MW	19	R	1192.77	0.0436847	0.881738	0.950927	-0.0691893
D-19-R-PC132	MW	19	R	2969.62	0.0436847	0.86527	0.832931	0.0323394
D-19-R-PC132	MW	19	R	804.351	0.0436847	0.965044	0.926772	0.0382726
D-19-R-PC132	MW	19	R	847.827	0.0436847	0.717776	0.667186	0.0505897
D-19-R-PC132	MW	19	R	561.917	0.0436847	0.844666	0.855084	-0.0104185
D-19-R-PC132	MW	19	R	561.917	0.0436847	0.950065	0.74041	0.209655
D-20-F-PC135	MW	20	F	678.261	0.00541772	0.915225	0.685525	0.2297
D-20-F-PC135	MW	20	F	1561.93	0.00541772	0.933161	0.918055	0.0151063
D-20-F-PC135	MW	20	F	2182.28	0.00541772	0.871253	0.54074	0.330512
D-20-F-PC135	MW	20	F	694.433	0.00541772	0.950154	0.911071	0.0390829
D-20-F-PC135	MW	20	F	981.614	0.00541772	0.992505	0.991503	0.00100236
D-20-F-PC135	MW	20	F	737.652	0.00541772	0.909466	0.934852	-0.0253861
D-20-F-PC135	MW	20	F	1066.4	0.00541772	0.956063	0.926205	0.0298582
D-20-F-PC135	MW	20	F	2198.35	0.00541772	0.913484	0.605586	0.307898
D-20-F-PC135	MW	20	F	2074.67	0.00541772	0.91979	0.597004	0.322786
D-20-F-PC135	MW	20	F	779.091	0.00541772	0.932512	0.85297	0.0795414
D-20-F-PC135	MW	20	F	848.34	0.00541772	0.826226	0.900795	-0.07457
D-20-F-PC135	MW	20	F	1813.71	0.00541772	0.893124	0.876254	0.0168697
D-20-F-PC135	MW	20	F	1534.68	0.00541772	0.924504	0.915165	0.00933825
D-20-F-PC135	MW	20	F	558.064	0.00541772	0.938103	0.918663	0.0194401
D-20-I-PC136	MW	20	I	804.351	0.00185859	0.853966	0.644418	0.209548
D-20-I-PC136	MW	20	I	1134	0.00185859	0.924461	0.740018	0.184443
D-20-I-PC136	MW	20	I	943	0.00185859	0.726921	0.530798	0.196123
D-20-I-PC136	MW	20	I	981.625	0.00185859	0.7991	0.846048	-0.0469487
D-20-I-PC136	MW	20	I	1770	0.00185859	0.9771	0.97235	0.00475007
D-20-I-PC136	MW	20	I	3517	0.00185859	0.987897	0.940343	0.047554
D-20-F-PC137	MW	20	F	1798.11	0.0486191	0.934382	0.773972	0.16041
D-20-F-PC137	MW	20	F	617.372	0.0486191	0.855995	0.86086	-0.00486469
D-20-F-PC137	MW	20	F	737.668	0.0486191	0.964126	0.933425	0.0307007
D-20-F-PC137	MW	20	F	800.622	0.0486191	0.807924	0.841113	-0.0331889
D-20-F-PC137	MW	20	F	561.917	0.0486191	0.957144	0.975911	-0.0187666
D-20-F-PC137	MW	20	F	1722.01	0.0486191	0.86043	0.663433	0.196997
D-20-F-PC137	MW	20	F	1337.11	0.0486191	0.909759	0.872828	0.0369314
D-20-F-PC137	MW	20	F	1033.4	0.0486191	0.953214	0.910612	0.0426019
D-20-F-PC137	MW	20	F	923.076	0.0486191	0.885303	0.858363	0.02694
D-20-F-PC137	MW	20	F	1674.11	0.0486191	0.896008	0.715163	0.180845
D-20-F-PC137	MW	20	F	1832.42	0.0486191	0.97117	0.940822	0.0303477
D-20-F-PC137	MW	20	F	2128.22	0.0486191	0.924779	0.852222	0.0725573
D-20-F-PC137	MW	20	F	689.887	0.0486191	0.926673	0.787455	0.139218
D-20-F-PC137	MW	20	F	1803.15	0.0486191	0.914473	0.881165	0.0333088
D-20-F-PC137	MW	20	F	1386.8	0.0486191	0.809879	0.605163	0.204716
D-20-F-PC137	MW	20	F	1029.79	0.0486191	0.876759	0.915716	-0.0389573
D-20-F-PC137	MW	20	F	2442.13	0.0486191	0.952739	0.864212	0.0885268
D-20-F-PC137	MW	20	F	593.636	0.0486191	0.878466	0.916238	-0.0377721
D-20-F-PC137	MW	20	F	1671	0.0486191	0.772163	0.65921	0.112954
D-20-F-PC137	MW	20	F	969.797	0.0486191	0.933867	0.806853	0.127014
D-20-F-PC137	MW	20	F	558.409	0.0486191	0.799049	0.926078	-0.127029
D-20-F-PC137	MW	20	F	1504	0.0486191	0.83057	0.605573	0.224998
D-20-F-PC137	MW	20	F	2290	0.0486191	0.889914	0.681186	0.208729
D-20-F-PC137	MW	20	F	1721.22	0.0486191	0.891612	0.856097	0.0355155
D-20-F-PC137	MW	20	F	1255.63	0.0486191	0.929287	0.654474	0.274813
D-20-F-PC137	MW	20	F	1677.37	0.0486191	0.857851	0.886659	-0.0288082
D-20-F-PC137	MW	20	F	1784.33	0.0486191	0.953826	0.941184	0.0126416
D-20-F-PC137	MW	20	F	1750.06	0.0486191	0.889105	0.813041	0.0760645
D-20-F-PC137	MW	20	F	1682.46	0.0486191	0.868988	0.865652	0.00333584
D-20-F-PC137	MW	20	F	723.235	0.0486191	0.87161	0.908654	-0.0370435
D-20-B-PC138	MW	20	B	1260.69	0.047822	0.720075	0.576099	0.143976
D-20-B-PC138	MW	20	B	937.419	0.047822	0.948895	0.9554	-0.00650512
D-20-B-PC138	MW	20	B	887.618	0.047822	0.878202	0.837793	0.0404098
D-20-B-PC138	MW	20	B	642.746	0.047822	0.888238	0.532171	0.356067
D-20-B-PC138	MW	20	B	3895.45	0.047822	0.900397	0.706053	0.194344
D-20-B-PC138	MW	20	B	1192.77	0.047822	0.886574	0.747815	0.138759
D-20-B-PC138	MW	20	B	1246.6	0.047822	0.89743	0.844015	0.0534154
D-20-B-PC138	MW	20	B	582.43	0.047822	0.88773	0.70031	0.187421
D-20-B-PC138	MW	20	B	1184.77	0.047822	0.96489	0.963822	0.00106778
D-20-B-PC138	MW	20	B	3674.42	0.047822	0.933653	0.848483	0.08517
D-20-B-PC138	MW	20	B	1653.07	0.047822	0.94167	0.851522	0.0901481
D-20-B-PC138	MW	20	B	1624.1	0.047822	0.959209	0.900054	0.0591558
D-20-B-PC138	MW	20	B	661.367	0.047822	0.875941	0.839738	0.0362029
D-20-B-PC138	MW	20	B	3811.01	0.047822	0.762961	0.505004	0.257957
D-20-B-PC138	MW	20	B	561.899	0.047822	0.796641	0.882718	-0.0860773
D-20-B-PC138	MW	20	B	1755.64	0.047822	0.850552	0.929549	-0.0789966
C-21-F-PC197	CA	21	F	1398.95	0.0134084	0.889495	0.749716	0.139779
C-21-F-PC197	CA	21	F	1581.19	0.0134084	0.922283	0.694253	0.228029
C-21-F-PC197	CA	21	F	1479.87	0.0134084	0.947651	0.901008	0.0466423
C-21-F-PC197	CA	21	F	2331.63	0.0134084	0.781214	0.768661	0.0125532
C-21-F-PC197	CA	21	F	2547	0.0134084	0.894522	0.761565	0.132956
C-21-F-PC197	CA	21	F	2519.86	0.0134084	0.787161	0.532687	0.254474
C-21-F-PC197	CA	21	F	3106.05	0.0134084	0.914506	0.915812	-0.00130582
C-21-F-PC197	CA	21	F	1167	0.0134084	0.920566	0.68717	0.233396
C-21-F-PC197	CA	21	F	820	0.0134084	0.956299	0.823637	0.132661
C-21-F-PC197	CA	21	F	2398.89	0.0134084	0.929658	0.904957	0.0247015
C-21-F-PC197	CA	21	F	3292.61	0.0134084	0.885696	0.662732	0.222964
C-21-F-PC197	CA	21	F	617.359	0.0134084	0.892739	0.828834	0.0639046
C-21-F-PC197	CA	21	F	2567.02	0.0134084	0.840151	0.617871	0.22228
C-21-F-PC197	CA	21	F	2082.42	0.0134084	0.863773	0.738026	0.125747
C-21-F-PC197	CA	21	F	723.227	0.0134084	0.83129	0.87266	-0.04137
C-21-F-PC197	CA	21	F	820	0.0134084	0.887341	0.928765	-0.0414249
C-21-F-PC197	CA	21	F	652	0.0134084	0.825728	0.813468	0.01226
C-21-F-PC197	CA	21	F	3951.97	0.0134084	0.867092	0.66075	0.206342
C-21-F-PC197	CA	21	F	1695.67	0.0134084	0.862335	0.778478	0.083857
C-21-F-PC197	CA	21	F	1255.64	0.0134084	0.864796	0.797397	0.0673986
C-21-F-PC197	CA	21	F	974.403	0.0134084	0.941454	0.899269	0.0421848
C-21-F-PC197	CA	21	F	1526.1	0.0134084	0.772439	0.612437	0.160002
C-21-F-PC197	CA	21	F	1844.99	0.0134084	0.887791	0.715625	0.172166
C-21-F-PC197	CA	21	F	1234.73	0.0134084	0.954828	0.79229	0.162539
C-21-F-PC197	CA	21	F	1733	0.0134084	0.896834	0.943059	-0.0462249
C-21-F-PC197	CA	21	F	1242	0.0134084	0.914753	0.905916	0.00883725
C-21-F-PC197	CA	21	F	1031	0.0134084	0.849761	0.793996	0.0557648
C-21-F-PC197	CA	21	F	2472.33	0.0134084	0.875546	0.647128	0.228419
C-21-F-PC197	CA	21	F	1084.92	0.0134084	0.832175	0.690147	0.142029
C-21-F-PC197	CA	21	F	923.076	0.0134084	0.887973	0.872061	0.0159123
C-21-F-PC197	CA	21	F	1860.49	0.0134084	0.814449	0.703645	0.110804
C-21-F-PC197	CA	21	F	2107.84	0.0134084	0.965192	0.928455	0.0367366
C-21-F-PC197	CA	21	F	2555.05	0.0134084	0.801533	0.692468	0.109064
C-21-F-PC197	CA	21	F	969.797	0.0134084	0.917902	0.879672	0.0382304
C-21-F-PC197	CA	21	F	1061.09	0.0134084	0.706814	0.715492	-0.00867805
C-21-F-PC197	CA	21	F	1236.16	0.0134084	0.921085	0.75457	0.166516
C-21-F-PC197	CA	21	F	1623.99	0.0134084	0.84089	0.563766	0.277125
C-21-F-PC197	CA	21	F	1526	0.0134084	0.900194	0.84682	0.0533741
C-21-F-PC197	CA	21	F	799.398	0.0134084	0.876773	0.783259	0.0935141
C-21-F-PC197	CA	21	F	1561.91	0.0134084	0.957139	0.888341	0.0687974
C-21-F-PC197	CA	21	F	1932.06	0.0134084	0.949283	0.928745	0.020538
C-21-F-PC197	CA	21	F	2827.2	0.0134084	0.832025	0.76549	0.0665358
C-21-F-PC197	CA	21	F	1369.81	0.0134084	0.92683	0.917375	0.00945477
C-21-F-PC197	CA	21	F	948.159	0.0134084	0.837751	0.804347	0.0334035
C-21-F-PC197	CA	21	F	2126	0.0134084	0.934567	0.770531	0.164036
C-21-F-PC197	CA	21	F	2053.61	0.0134084	0.832123	0.737134	0.0949893
C-21-F-PC197	CA	21	F	2074.84	0.0134084	0.971323	0.982269	-0.010946
C-21-F-PC197	CA	21	F	1306.01	0.0134084	0.929978	0.880816	0.049162
C-21-F-PC197	CA	21	F	1355.01	0.0134084	0.879735	0.747848	0.131887
C-21-I-PC202	CA	21	I	946.554	0.0232995	0.751419	0.9051	-0.153681
C-21-I-PC202	CA	21	I	665.706	0.0232995	0.941327	0.908502	0.0328246
C-21-I-PC202	CA	21	I	4188.27	0.0232995	0.873895	0.58603	0.287865
C-21-I-PC202	CA	21	I	3457.46	0.0232995	0.80028	0.573249	0.227032
C-21-I-PC202	CA	21	I	887.609	0.0232995	0.880023	0.875998	0.00402542
C-21-I-PC202	CA	21	I	1601.24	0.0232995	0.96812	0.956603	0.0115178
C-21-I-PC202	CA	21	I	1402.83	0.0232995	0.788729	0.778509	0.0102204
C-21-I-PC202	CA	21	I	2059.58	0.0232995	0.850339	0.874976	-0.0246364
C-21-I-PC202	CA	21	I	1695.76	0.0232995	0.91969	0.876664	0.0430253
C-21-I-PC202	CA	21	I	1753.91	0.0232995	0.899565	0.723915	0.17565
C-21-I-PC202	CA	21	I	1744.33	0.0232995	0.967356	0.852326	0.11503
C-21-I-PC202	CA	21	I	582.449	0.0232995	0.948762	0.933195	0.0155674
C-21-I-PC202	CA	21	I	3335.6	0.0232995	0.859354	0.780429	0.0789258
C-21-I-PC202	CA	21	I	876.984	0.0232995	0.942227	0.828867	0.113361
C-21-I-PC202	CA	21	I	2058.31	0.0232995	0.821077	0.74409	0.0769869
C-21-I-PC202	CA	21	I	898.444	0.0232995	0.902163	0.746073	0.15609
C-21-I-PC202	CA	21	I	937.439	0.0232995	0.862466	0.77398	0.0884864
C-21-I-PC202	CA	21	I	1556.04	0.0232995	0.948225	0.895198	0.0530273
C-21-I-PC202	CA	21	I	1046.4	0.0232995	0.938383	0.879519	0.0588639
C-21-I-PC202	CA	21	I	712.644	0.0232995	0.947239	0.786727	0.160512
C-21-I-PC202	CA	21	I	697.595	0.0232995	0.787725	0.843817	-0.0560925
C-21-I-PC202	CA	21	I	1151.22	0.0232995	0.828864	0.945794	-0.11693
C-21-I-PC202	CA	21	I	1308.16	0.0232995	0.981573	0.895782	0.0857906
C-21-I-PC202	CA	21	I	1864.44	0.0232995	0.99186	0.988478	0.00338281
C-21-I-PC202	CA	21	I	937.419	0.0232995	0.751062	0.791542	-0.0404798
C-21-I-PC202	CA	21	I	1308.87	0.0232995	0.898837	0.851026	0.0478112
C-21-I-PC202	CA	21	I	779.099	0.0232995	0.925786	0.930074	-0.0042881
C-21-I-PC202	CA	21	I	527.067	0.0232995	0.915695	0.802686	0.113009
C-21-I-PC202	CA	21	I	781.375	0.0232995	0.95824	0.963302	-0.00506136
C-21-I-PC202	CA	21	I	4234.86	0.0232995	0.825773	0.671114	0.154658
C-21-I-PC202	CA	21	I	1765.11	0.0232995	0.920486	0.918375	0.00211021
C-21-I-PC202	CA	21	I	1691.98	0.0232995	0.947866	0.90328	0.0445861
C-21-I-PC202	CA	21	I	4452	0.0232995	0.936857	0.876925	0.0599311
C-21-I-PC202	CA	21	I	1139.65	0.0232995	0.895533	0.776226	0.119307
C-21-I-PC202	CA	21	I	2274.79	0.0232995	0.824499	0.968153	-0.143654
C-21-I-PC202	CA	21	I	4296.25	0.0232995	0.863833	0.713153	0.15068
C-21-I-PC202	CA	21	I	956.122	0.0232995	0.901018	0.878633	0.0223841
C-21-I-PC202	CA	21	I	2511.29	0.0232995	0.897892	0.692186	0.205706
C-21-I-PC202	CA	21	I	2101.68	0.0232995	0.917754	0.795915	0.121839
C-21-I-PC202	CA	21	I	697.58	0.0232995	0.953857	0.94546	0.00839719
C-21-I-PC202	CA	21	I	1289.66	0.0232995	0.938381	0.940594	-0.00221239
C-21-I-PC202	CA	21	I	3528.28	0.0232995	0.951574	0.907166	0.0444079
C-21-I-PC202	CA	21	I	3248.23	0.0232995	0.938905	0.89685	0.0420545
C-21-I-PC202	CA	21	I	3248.23	0.0232995	0.863562	0.814831	0.048731
C-21-I-PC202	CA	21	I	785.314	0.0232995	0.91265	0.937426	-0.0247759
C-21-I-PC202	CA	21	I	1184.78	0.0232995	0.957516	0.859681	0.0978348
C-21-I-PC202	CA	21	I	2997.78	0.0232995	0.734804	0.585575	0.149229
C-21-I-PC202	CA	21	I	924.552	0.0232995	0.919981	0.868434	0.0515474
C-21-I-PC202	CA	21	I	1176.76	0.0232995	0.843649	0.633338	0.210311
C-21-I-PC202	CA	21	I	4779.64	0.0232995	0.939942	0.755285	0.184657
C-21-B-PC207	CA	21	B	970.876	0.0204979	0.95408	0.932245	0.0218349
C-21-B-PC207	CA	21	B	1633.67	0.0204979	0.964346	0.879446	0.0848998
C-21-B-PC207	CA	21	B	2627.6	0.0204979	0.965181	0.848624	0.116557
C-21-B-PC207	CA	21	B	3983.87	0.0204979	0.977614	0.975518	0.00209566
C-21-B-PC207	CA	21	B	2197.78	0.0204979	0.793064	0.59416	0.198904
C-21-B-PC207	CA	21	B	1325.47	0.0204979	0.900956	0.781066	0.119891
C-21-B-PC207	CA	21	B	931.6	0.0204979	0.97999	0.864351	0.115639
C-21-B-PC207	CA	21	B	1679.93	0.0204979	0.981015	0.858482	0.122533
C-21-B-PC207	CA	21	B	1285.49	0.0204979	0.957514	0.865702	0.0918118
C-21-B-PC207	CA	21	B	956.122	0.0204979	0.933729	0.867293	0.0664358
C-21-B-PC207	CA	21	B	3348.38	0.0204979	0.940964	0.898375	0.0425884
C-21-B-PC207	CA	21	B	1869.7	0.0204979	0.790087	0.890201	-0.100114
C-21-B-PC207	CA	21	B	2612.49	0.0204979	0.706415	0.54334	0.163075
C-21-B-PC207	CA	21	B	500.062	0.0204979	0.898566	0.943523	-0.0449579
C-21-B-PC207	CA	21	B	946.554	0.0204979	0.92193	0.942966	-0.021036
C-21-B-PC207	CA	21	B	1174.57	0.0204979	0.978829	0.96978	0.00904884
C-21-B-PC207	CA	21	B	593.636	0.0204979	0.916128	0.850685	0.0654422
C-21-B-PC207	CA	21	B	3744.99	0.0204979	0.887489	0.736075	0.151414
C-21-B-PC207	CA	21	B	3343.02	0.0204979	0.888898	0.534805	0.354092
C-21-B-PC207	CA	21	B	945.774	0.0204979	0.845505	0.750725	0.0947801
C-21-B-PC207	CA	21	B	2037.45	0.0204979	0.895343	0.827657	0.0676861
C-21-B-PC207	CA	21	B	2832.92	0.0204979	0.932695	0.944313	-0.0116174
C-21-B-PC207	CA	21	B	2707.39	0.0204979	0.956107	0.933869	0.0222378
C-21-B-PC207	CA	21	B	3871.93	0.0204979	0.872647	0.872243	0.000403886
C-21-B-PC207	CA	21	B	873	0.0204979	0.921978	0.875631	0.0463464
C-21-B-PC207	CA	21	B	559	0.0204979	0.887317	0.866222	0.0210955
C-21-B-PC207	CA	21	B	767.074	0.0204979	0.771841	0.819751	-0.0479099
C-21-B-PC207	CA	21	B	837.087	0.0204979	0.857623	0.73056	0.127063
C-21-B-PC207	CA	21	B	1202	0.0204979	0.97904	0.960337	0.0187024
C-21-B-PC207	CA	21	B	541	0.0204979	0.959637	0.811647	0.14799
C-21-B-PC207	CA	21	B	923.076	0.0204979	0.96682	0.975032	-0.00821196
C-21-B-PC207	CA	21	B	2389.97	0.0204979	0.929733	0.909928	0.0198045
C-21-B-PC207	CA	21	B	1275.86	0.0204979	0.815365	0.790833	0.0245322
C-21-B-PC207	CA	21	B	1443.86	0.0204979	0.875197	0.694223	0.180973
C-21-B-PC207	CA	21	B	931.59	0.0204979	0.943159	0.936023	0.00713565
C-21-B-PC207	CA	21	B	998.05	0.0204979	0.863512	0.901572	-0.0380604
C-21-B-PC207	CA	21	B	1415.16	0.0204979	0.947382	0.897947	0.0494354
C-21-B-PC207	CA	21	B	969.797	0.0204979	0.94744	0.93953	0.0079097
C-21-B-PC207	CA	21	B	546.859	0.0204979	0.803624	0.730779	0.0728445
C-21-B-PC207	CA	21	B	2183.4	0.0204979	0.947973	0.90745	0.0405235
C-21-B-PC207	CA	21	B	896.832	0.0204979	0.962481	0.903895	0.0585858
C-21-B-PC207	CA	21	B	2100	0.0204979	0.831354	0.636172	0.195182
C-21-B-PC207	CA	21	B	2631.22	0.0204979	0.910928	0.90684	0.00408792
C-21-B-PC207	CA	21	B	1494.33	0.0204979	0.913385	0.929046	-0.0156611
C-21-B-PC207	CA	21	B	661.395	0.0204979	0.983027	0.978266	0.00476097
C-21-B-PC207	CA	21	B	2610	0.0204979	0.895629	0.909995	-0.0143658
C-21-B-PC207	CA	21	B	1945	0.0204979	0.731906	0.714473	0.0174323
C-21-B-PC207	CA	21	B	1173.15	0.0204979	0.88798	0.738101	0.149879
C-21-B-PC207	CA	21	B	800.63	0.0204979	0.933597	0.963098	-0.0295012
C-21-B-PC207	CA	21	B	1891.57	0.0204979	0.923118	0.852242	0.0708756
C-21-B-PC207	CA	21	B	1614.63	0.0204979	0.977094	0.945558	0.0315364
C-21-R-PC212	CA	21	R	1331	0.0438781	0.868149	0.890368	-0.022219
C-21-R-PC212	CA	21	R	3321.31	0.0438781	0.791848	0.647534	0.144314
C-21-R-PC212	CA	21	R	3146.98	0.0438781	0.854704	0.901448	-0.046744
C-21-R-PC212	CA	21	R	2693.09	0.0438781	0.811982	0.568802	0.24318
C-21-R-PC212	CA	21	R	896.842	0.0438781	0.848596	0.852244	-0.00364837
C-21-R-PC212	CA	21	R	976.612	0.0438781	0.791142	0.944644	-0.153501
C-21-R-PC212	CA	21	R	2107.92	0.0438781	0.852301	0.944371	-0.09207
C-21-R-PC212	CA	21	R	2151	0.0438781	0.835206	0.677861	0.157345
C-21-R-PC212	CA	21	R	3050.92	0.0438781	0.893528	0.729527	0.164002
C-21-R-PC212	CA	21	R	3485.73	0.0438781	0.778608	0.484455	0.294153
C-21-R-PC212	CA	21	R	1442.79	0.0438781	0.774973	0.760245	0.0147284
C-21-R-PC212	CA	21	R	775.656	0.0438781	0.799293	0.780329	0.0189646
C-21-R-PC212	CA	21	R	1942.27	0.0438781	0.787873	0.860319	-0.0724457
C-21-R-PC212	CA	21	R	797.839	0.0438781	0.809113	0.63462	0.174493
C-21-R-PC212	CA	21	R	3922	0.0438781	0.797687	0.660239	0.137448
C-21-R-PC212	CA	21	R	1812	0.0438781	0.864606	0.656158	0.208448
C-21-R-PC212	CA	21	R	1408	0.0438781	0.86792	0.921042	-0.0531218
C-21-R-PC212	CA	21	R	1331.43	0.0438781	0.845841	0.752827	0.0930138
C-21-R-PC212	CA	21	R	4813	0.0438781	0.741838	0.753671	-0.0118328
C-21-R-PC212	CA	21	R	1607	0.0438781	0.74257	0.536096	0.206474
C-22-F-PC177	CA	22	F	586.569	0.00408489	0.842656	0.693348	0.149308
C-22-F-PC177	CA	22	F	714.073	0.00408489	0.989838	0.929158	0.0606804
C-22-F-PC177	CA	22	F	548.066	0.00408489	0.810817	0.644788	0.166029
C-22-F-PC177	CA	22	F	1660.64	0.00408489	0.931809	0.838909	0.0929001
C-22-F-PC177	CA	22	F	617.359	0.00408489	0.94909	0.857987	0.0911022
C-22-F-PC177	CA	22	F	2213.93	0.00408489	0.936548	0.931921	0.00462746
C-22-F-PC177	CA	22	F	546.859	0.00408489	0.793492	0.73019	0.0633022
C-22-F-PC177	CA	22	F	1638	0.00408489	0.835623	0.503661	0.331962
C-22-F-PC177	CA	22	F	739	0.00408489	0.940813	0.767453	0.17336
C-22-F-PC177	CA	22	F	1100.44	0.00408489	0.888255	0.876975	0.0112804
C-22-F-PC177	CA	22	F	1490.31	0.00408489	0.741978	0.834137	-0.0921594
C-22-F-PC177	CA	22	F	937.419	0.00408489	0.936653	0.993478	-0.0568251
C-22-F-PC177	CA	22	F	631.453	0.00408489	0.727703	0.762536	-0.0348324
C-22-F-PC177	CA	22	F	678.269	0.00408489	0.832246	0.856487	-0.0242404
C-22-F-PC177	CA	22	F	558.064	0.00408489	0.98645	0.940669	0.045781
C-22-F-PC177	CA	22	F	1527.12	0.00408489	0.869156	0.929636	-0.0604801
C-22-F-PC177	CA	22	F	1607.51	0.00408489	0.931236	0.979028	-0.0477919
C-22-F-PC177	CA	22	F	968.902	0.00408489	0.906045	0.844784	0.0612605
C-22-F-PC177	CA	22	F	832.23	0.00408489	0.994509	0.981098	0.0134107
C-22-F-PC177	CA	22	F	2085.53	0.00408489	0.973341	0.874963	0.0983774
C-22-F-PC177	CA	22	F	2148	0.00408489	0.924105	0.987627	-0.063522
C-22-F-PC177	CA	22	F	1051	0.00408489	0.942277	0.77678	0.165497
C-22-F-PC177	CA	22	F	538.208	0.00408489	0.972065	0.981099	-0.00903407
C-22-F-PC177	CA	22	F	1953	0.00408489	0.975725	0.981477	-0.00575224
C-22-F-PC177	CA	22	F	849	0.00408489	0.862191	0.709082	0.153109
C-22-F-PC177	CA	22	F	2686	0.00408489	0.980304	0.936493	0.0438106
C-22-F-PC177	CA	22	F	1981	0.00408489	0.957023	0.846486	0.110537
C-22-F-PC177	CA	22	F	832	0.00408489	0.994037	0.980673	0.0133644
C-22-F-PC177	CA	22	F	696	0.00408489	0.983772	0.985081	-0.00130866
C-22-F-PC177	CA	22	F	3332.37	0.00408489	0.922948	0.966231	-0.0432829
C-22-F-PC177	CA	22	F	4140.06	0.00408489	0.991238	0.981593	0.00964541
C-22-F-PC177	CA	22	F	649.602	0.00408489	0.986798	0.95881	0.0279879
C-22-F-PC177	CA	22	F	538.208	0.00408489	0.958838	0.969317	-0.0104795
C-22-F-PC177	CA	22	F	1054.13	0.00408489	0.758083	0.62051	0.137573
C-22-F-PC177	CA	22	F	2469.46	0.00408489	0.855576	0.879038	-0.0234615
C-22-F-PC177	CA	22	F	1167	0.00408489	0.820769	0.498857	0.321912
C-22-F-PC177	CA	22	F	840.459	0.00408489	0.920353	0.899443	0.0209104
C-22-F-PC177	CA	22	F	1460.8	0.00408489	0.963896	0.962135	0.00176094
C-22-F-PC177	CA	22	F	2362.56	0.00408489	0.81085	0.75094	0.05991
C-22-F-PC177	CA	22	F	896.842	0.00408489	0.886859	0.786117	0.100741
C-22-P-PC182	CA	22	P	1674.97	0.0416976	0.874207	0.953268	-0.0790611
C-22-P-PC182	CA	22	P	1063.99	0.0416976	0.851651	0.714896	0.136755
C-22-P-PC182	CA	22	P	2260.18	0.0416976	0.800182	0.693482	0.1067
C-22-P-PC182	CA	22	P	3800.21	0.0416976	0.780237	0.825068	-0.0448307
C-22-P-PC182	CA	22	P	2580.12	0.0416976	0.757496	0.889979	-0.132483
C-22-P-PC182	CA	22	P	767.074	0.0416976	0.896477	0.935778	-0.0393007
C-22-P-PC182	CA	22	P	1833	0.0416976	0.80224	0.936923	-0.134682
C-22-P-PC182	CA	22	P	1383	0.0416976	0.775486	0.803155	-0.0276694
C-22-P-PC182	CA	22	P	1000.59	0.0416976	0.863834	0.837321	0.0265126
C-22-P-PC182	CA	22	P	1013.86	0.0416976	0.822403	0.79396	0.0284429
C-22-P-PC182	CA	22	P	1432.07	0.0416976	0.837499	0.97136	-0.133862
C-22-P-PC182	CA	22	P	2187.43	0.0416976	0.84204	0.936254	-0.0942139
C-22-P-PC182	CA	22	P	1058.12	0.0416976	0.80379	0.731417	0.072373
C-22-P-PC182	CA	22	P	3292.61	0.0416976	0.885199	0.500707	0.384492
C-22-P-PC182	CA	22	P	2644	0.0416976	0.80072	0.525308	0.275413
C-22-P-PC182	CA	22	P	4064	0.0416976	0.83073	0.956008	-0.125278
C-22-P-PC182	CA	22	P	923.076	0.0416976	0.908803	0.941366	-0.0325625
C-22-P-PC182	CA	22	P	538.203	0.0416976	0.853059	0.904337	-0.0512779
C-22-P-PC182	CA	22	P	1221.68	0.0416976	0.744663	0.87363	-0.128967
C-22-P-PC182	CA	22	P	1157.31	0.0416976	0.732695	0.764988	-0.0322931
C-22-P-PC182	CA	22	P	803.748	0.0416976	0.82508	0.895713	-0.0706338
C-22-P-PC182	CA	22	P	931.59	0.0416976	0.837742	0.922779	-0.085037
C-22-P-PC182	CA	22	P	1964	0.0416976	0.844477	0.808129	0.0363483
C-22-P-PC182	CA	22	P	3513.45	0.0416976	0.882002	0.983336	-0.101334
C-22-P-PC182	CA	22	P	948.159	0.0416976	0.704672	0.668204	0.0364676
C-22-P-PC182	CA	22	P	3127.31	0.0416976	0.856222	0.937139	-0.0809167
C-22-P-PC182	CA	22	P	4044.48	0.0416976	0.808155	0.745753	0.0624011
C-22-P-PC182	CA	22	P	2521.35	0.0416976	0.865938	0.903481	-0.0375431
C-22-P-PC182	CA	22	P	1808.53	0.0416976	0.839194	0.757477	0.0817166
C-22-P-PC182	CA	22	P	558.064	0.0416976	0.843282	0.795595	0.0476865
C-22-P-PC182	CA	22	P	2587.69	0.0416976	0.87082	0.95158	-0.0807599
C-22-P-PC182	CA	22	P	997.654	0.0416976	0.824687	0.835585	-0.0108979
C-22-P-PC182	CA	22	P	2401.34	0.0416976	0.881101	0.944512	-0.0634106
C-22-P-PC182	CA	22	P	3444	0.0416976	0.886394	0.983818	-0.0974231
C-22-P-PC182	CA	22	P	969.413	0.0416976	0.754573	0.686573	0.0679997
C-22-P-PC182	CA	22	P	2176	0.0416976	0.813039	0.826267	-0.0132276
C-22-P-PC182	CA	22	P	538.203	0.0416976	0.727575	0.776613	-0.049038
C-22-P-PC182	CA	22	P	1026.25	0.0416976	0.838742	0.798778	0.039964
C-22-P-PC182	CA	22	P	1184.77	0.0416976	0.860109	0.934399	-0.0742902
C-22-P-PC182	CA	22	P	1999.01	0.0416976	0.810497	0.955309	-0.144812
C-22-P-PC182	CA	22	P	1193	0.0416976	0.961364	0.917404	0.0439601
C-22-P-PC182	CA	22	P	1800	0.0416976	0.735998	0.821695	-0.085697
C-22-P-PC182	CA	22	P	1912.24	0.0416976	0.825835	0.712462	0.113374
E-24-R-PC278	W	24	R	1037.42	0.031941	0.994092	0.988783	0.00530917
E-24-R-PC278	W	24	R	1471	0.031941	0.984056	0.972643	0.0114127
E-24-R-PC278	W	24	R	803.748	0.031941	0.983357	0.982714	0.000642726
E-24-R-PC278	W	24	R	861.237	0.031941	0.90273	0.918263	-0.0155329
E-24-R-PC278	W	24	R	599.549	0.031941	0.93856	0.883593	0.0549667
E-24-R-PC278	W	24	R	861.237	0.031941	0.776105	0.906777	-0.130672
E-24-R-PC278	W	24	R	1371.88	0.031941	0.93215	0.911763	0.0203868
E-24-R-PC278	W	24	R	1784.4	0.031941	0.900599	0.966573	-0.0659748
E-24-R-PC278	W	24	R	2443.36	0.031941	0.991886	0.988443	0.00344258
E-24-R-PC278	W	24	R	1061	0.031941	0.987204	0.994609	-0.0074051
E-24-R-PC278	W	24	R	1312	0.031941	0.972889	0.992808	-0.0199197
E-24-R-PC278	W	24	R	948.159	0.031941	0.884554	0.827986	0.0565677
E-24-R-PC278	W	24	R	1930	0.031941	0.971339	0.97316	-0.00182182
E-24-R-PC278	W	24	R	702	0.031941	0.717165	0.688775	0.0283894
E-24-R-PC278	W	24	R	1096.13	0.031941	0.891457	0.911881	-0.020424
E-24-R-PC278	W	24	R	1163	0.031941	0.973008	0.983794	-0.0107858
E-24-R-PC278	W	24	R	680	0.031941	0.90618	0.980491	-0.0743117
E-24-R-PC278	W	24	R	610	0.031941	0.97819	0.804307	0.173883
E-24-R-PC278	W	24	R	852	0.031941	0.914577	0.949059	-0.0344816
E-24-R-PC278	W	24	R	1102.17	0.031941	0.922803	0.937108	-0.0143055
E-24-R-PC278	W	24	R	740.201	0.031941	0.878784	0.783889	0.0948949
E-24-R-PC278	W	24	R	651	0.031941	0.753861	0.694317	0.0595439
E-24-R-PC278	W	24	R	625	0.031941	0.921573	0.952645	-0.0310715
E-24-R-PC278	W	24	R	735	0.031941	0.863131	0.735973	0.127158
E-24-R-PC278	W	24	R	1018	0.031941	0.704298	0.84721	-0.142912
E-24-R-PC278	W	24	R	746	0.031941	0.77795	0.679562	0.0983887
E-24-R-PC278	W	24	R	1646.3	0.031941	0.769863	0.768582	0.00128104
E-24-R-PC278	W	24	R	779.499	0.031941	0.882271	0.909572	-0.027301
E-24-R-PC278	W	24	R	558.058	0.031941	0.971643	0.936372	0.0352713
E-24-R-PC278	W	24	R	1570.63	0.031941	0.972042	0.956041	0.0160008
E-24-R-PC278	W	24	R	527.067	0.031941	0.781718	0.813091	-0.031373
E-24-R-PC278	W	24	R	677.513	0.031941	0.713327	0.80724	-0.0939122
E-24-R-PC278	W	24	R	978.631	0.031941	0.829712	0.908384	-0.0786719
E-24-R-PC278	W	24	R	1832.42	0.031941	0.841148	0.666793	0.174355
E-24-R-PC278	W	24	R	838.683	0.031941	0.986071	0.941746	0.0443247
E-24-R-PC278	W	24	R	1638	0.031941	0.737523	0.71556	0.0219629
E-24-R-PC278	W	24	R	673	0.031941	0.95732	0.927442	0.0298776
E-24-R-PC278	W	24	R	657	0.031941	0.916828	0.894272	0.0225569
E-24-R-PC278	W	24	R	1308.87	0.031941	0.960321	0.90248	0.0578418
E-24-R-PC278	W	24	R	1780.46	0.031941	0.798537	0.632114	0.166423
E-24-R-PC278	W	24	R	2335.57	0.031941	0.898566	0.857136	0.0414306
E-24-R-PC278	W	24	R	2335.57	0.031941	0.930394	0.896344	0.0340501
E-24-R-PC278	W	24	R	1049.11	0.031941	0.890047	0.881733	0.00831398
E-24-R-PC278	W	24	R	527.067	0.031941	0.864108	0.918146	-0.0540381
E-24-R-PC278	W	24	R	1139.65	0.031941	0.990239	0.991378	-0.00113971
E-24-R-PC278	W	24	R	641.732	0.031941	0.726888	0.652379	0.0745088
E-24-R-PC278	W	24	R	727.274	0.031941	0.97174	0.864736	0.107004
E-24-R-PC278	W	24	R	3520.04	0.031941	0.923428	0.733705	0.189723
E-24-R-PC278	W	24	R	1186.97	0.031941	0.886043	0.959141	-0.0730986
E-24-R-PC278	W	24	R	3304.94	0.031941	0.893972	0.835978	0.057994
E-24-R-PC278	W	24	R	3163.44	0.031941	0.932789	0.946935	-0.0141457
E-24-R-PC278	W	24	R	593.485	0.031941	0.910663	0.988083	-0.0774195
E-24-R-PC278	W	24	R	2919.9	0.031941	0.925495	0.957809	-0.0323141
E-24-I-PC283	W	24	I	599.549	0.0510101	0.910101	0.909167	0.000934857
E-24-I-PC283	W	24	I	2155.56	0.0510101	0.758459	0.698283	0.060176
E-24-I-PC283	W	24	I	631.446	0.0510101	0.787837	0.889882	-0.102044
E-24-I-PC283	W	24	I	630.338	0.0510101	0.714378	0.691393	0.0229851
E-24-I-PC283	W	24	I	1414.67	0.0510101	0.771088	0.937648	-0.16656
E-24-I-PC283	W	24	I	538.203	0.0510101	0.804235	0.702299	0.101936
E-24-I-PC283	W	24	I	1891.01	0.0510101	0.774477	0.676628	0.0978495
E-24-I-PC283	W	24	I	2389.97	0.0510101	0.937245	0.9707	-0.0334544
E-24-I-PC283	W	24	I	1351.81	0.0510101	0.837519	0.807806	0.0297135
E-24-I-PC283	W	24	I	840.45	0.0510101	0.942408	0.954433	-0.0120246
E-24-I-PC283	W	24	I	1164.9	0.0510101	0.879775	0.919693	-0.0399184
E-24-I-PC283	W	24	I	513.38	0.0510101	0.766705	0.72985	0.036855
E-24-I-PC283	W	24	I	1313.87	0.0510101	0.951979	0.962732	-0.0107528
E-24-I-PC283	W	24	I	1442.19	0.0510101	0.848515	0.806061	0.0424536
E-24-I-PC283	W	24	I	1868.3	0.0510101	0.880115	0.72098	0.159135
E-24-I-PC283	W	24	I	974.403	0.0510101	0.759503	0.761258	-0.00175515
E-24-I-PC283	W	24	I	587.731	0.0510101	0.766433	0.830653	-0.0642207
E-24-I-PC283	W	24	I	624.816	0.0510101	0.890016	0.745627	0.144389
E-24-I-PC283	W	24	I	966.039	0.0510101	0.936568	0.928911	0.00765749
E-24-I-PC283	W	24	I	816.817	0.0510101	0.799843	0.904849	-0.105006
E-24-I-PC283	W	24	I	1560.98	0.0510101	0.873215	0.897154	-0.0239386
E-24-I-PC283	W	24	I	1398.96	0.0510101	0.882581	0.900013	-0.0174313
E-24-I-PC283	W	24	I	723.235	0.0510101	0.849705	0.949129	-0.0994238
E-24-I-PC283	W	24	I	610.846	0.0510101	0.74241	0.657176	0.085234
E-24-I-PC283	W	24	I	1169.26	0.0510101	0.796255	0.78048	0.0157745
E-24-I-PC283	W	24	I	1347.49	0.0510101	0.961873	0.890237	0.0716358
E-24-I-PC283	W	24	I	937.419	0.0510101	0.703133	0.733924	-0.0307909
E-24-I-PC283	W	24	I	974.403	0.0510101	0.939445	0.821761	0.117684
E-24-I-PC283	W	24	I	2246.92	0.0510101	0.951382	0.984519	-0.0331372
E-24-I-PC283	W	24	I	861.247	0.0510101	0.950973	0.927911	0.0230621
E-24-I-PC283	W	24	I	1236.18	0.0510101	0.922208	0.941947	-0.0197391
E-24-I-PC283	W	24	I	1384.63	0.0510101	0.876955	0.902969	-0.0260146
E-24-I-PC283	W	24	I	675.915	0.0510101	0.753964	0.888845	-0.134881
E-24-I-PC283	W	24	I	1301.81	0.0510101	0.920185	0.928401	-0.00821656
E-24-I-PC283	W	24	I	1614.68	0.0510101	0.895541	0.976056	-0.0805144
E-24-I-PC283	W	24	I	918.645	0.0510101	0.848755	0.706504	0.142251
E-24-I-PC283	W	24	I	1122.97	0.0510101	0.797779	0.762914	0.0348651
E-24-I-PC283	W	24	I	804.386	0.0510101	0.931366	0.93479	-0.00342432
E-24-I-PC283	W	24	I	617.385	0.0510101	0.839773	0.922454	-0.0826803
E-24-I-PC283	W	24	I	2313.85	0.0510101	0.865519	0.960059	-0.0945399
E-24-I-PC283	W	24	I	2092.81	0.0510101	0.886884	0.861666	0.0252179
E-24-I-PC283	W	24	I	4629.91	0.0510101	0.79522	0.697749	0.0974717
E-24-I-PC283	W	24	I	4208	0.0510101	0.895846	0.596094	0.299753
E-24-I-PC283	W	24	I	1137.43	0.0510101	0.766072	0.687611	0.078461
E-24-I-PC283	W	24	I	743	0.0510101	0.786544	0.812714	-0.0261701
E-24-I-PC283	W	24	I	1612	0.0510101	0.954833	0.940341	0.0144921
E-24-I-PC283	W	24	I	1155.61	0.0510101	0.839551	0.770967	0.0685838
E-24-I-PC283	W	24	I	785.348	0.0510101	0.852875	0.909596	-0.0567219
E-24-I-PC283	W	24	I	1248.21	0.0510101	0.9067	0.947404	-0.0407034
E-24-F-PC288	W	24	F	812.058	0.0147848	0.895018	0.581253	0.313765
E-24-F-PC288	W	24	F	1199.11	0.0147848	0.927888	0.766714	0.161175
E-24-F-PC288	W	24	F	1750.06	0.0147848	0.882968	0.877655	0.00531338
E-24-F-PC288	W	24	F	918	0.0147848	0.975969	0.908484	0.0674845
E-24-F-PC288	W	24	F	558.064	0.0147848	0.994691	0.984207	0.0104841
E-24-F-PC288	W	24	F	2729.47	0.0147848	0.97692	0.92007	0.0568503
E-24-F-PC288	W	24	F	1856	0.0147848	0.796661	0.703426	0.0932348
E-24-F-PC288	W	24	F	678.261	0.0147848	0.936901	0.848868	0.0880327
E-24-F-PC288	W	24	F	1965	0.0147848	0.993555	0.992569	0.00098517
E-24-F-PC288	W	24	F	1635	0.0147848	0.924758	0.992887	-0.0681296
E-24-F-PC288	W	24	F	538.203	0.0147848	0.942886	0.924939	0.0179466
E-24-F-PC288	W	24	F	1796.83	0.0147848	0.932349	0.670156	0.262194
E-24-F-PC288	W	24	F	1303.17	0.0147848	0.865303	0.772257	0.0930459
E-24-F-PC288	W	24	F	779.091	0.0147848	0.958647	0.928541	0.0301062
E-24-F-PC288	W	24	F	716.034	0.0147848	0.891135	0.930379	-0.0392438
E-24-F-PC288	W	24	F	1223.97	0.0147848	0.958965	0.964612	-0.00564634
E-24-F-PC288	W	24	F	1775.22	0.0147848	0.852366	0.805416	0.0469503
E-24-F-PC288	W	24	F	561.917	0.0147848	0.980562	0.989859	-0.00929636
E-24-F-PC288	W	24	F	918.485	0.0147848	0.871915	0.76538	0.106535
E-24-F-PC288	W	24	F	785.314	0.0147848	0.908761	0.89561	0.0131507
E-24-F-PC288	W	24	F	1912.22	0.0147848	0.898804	0.831396	0.067408
E-24-F-PC288	W	24	F	965.343	0.0147848	0.898016	0.824229	0.0737872
E-24-F-PC288	W	24	F	1215.71	0.0147848	0.939289	0.932251	0.00703863
E-24-F-PC288	W	24	F	1423	0.0147848	0.897558	0.823884	0.0736736
E-24-F-PC288	W	24	F	734.366	0.0147848	0.828527	0.781045	0.0474818
E-24-F-PC288	W	24	F	923.076	0.0147848	0.964139	0.98427	-0.0201313
E-24-F-PC288	W	24	F	697.572	0.0147848	0.971136	0.953935	0.0172013
