# Supplementary material
Source: MDPI journal article supplement (https://www.mdpi.com/2075-163X/12/12/1555)

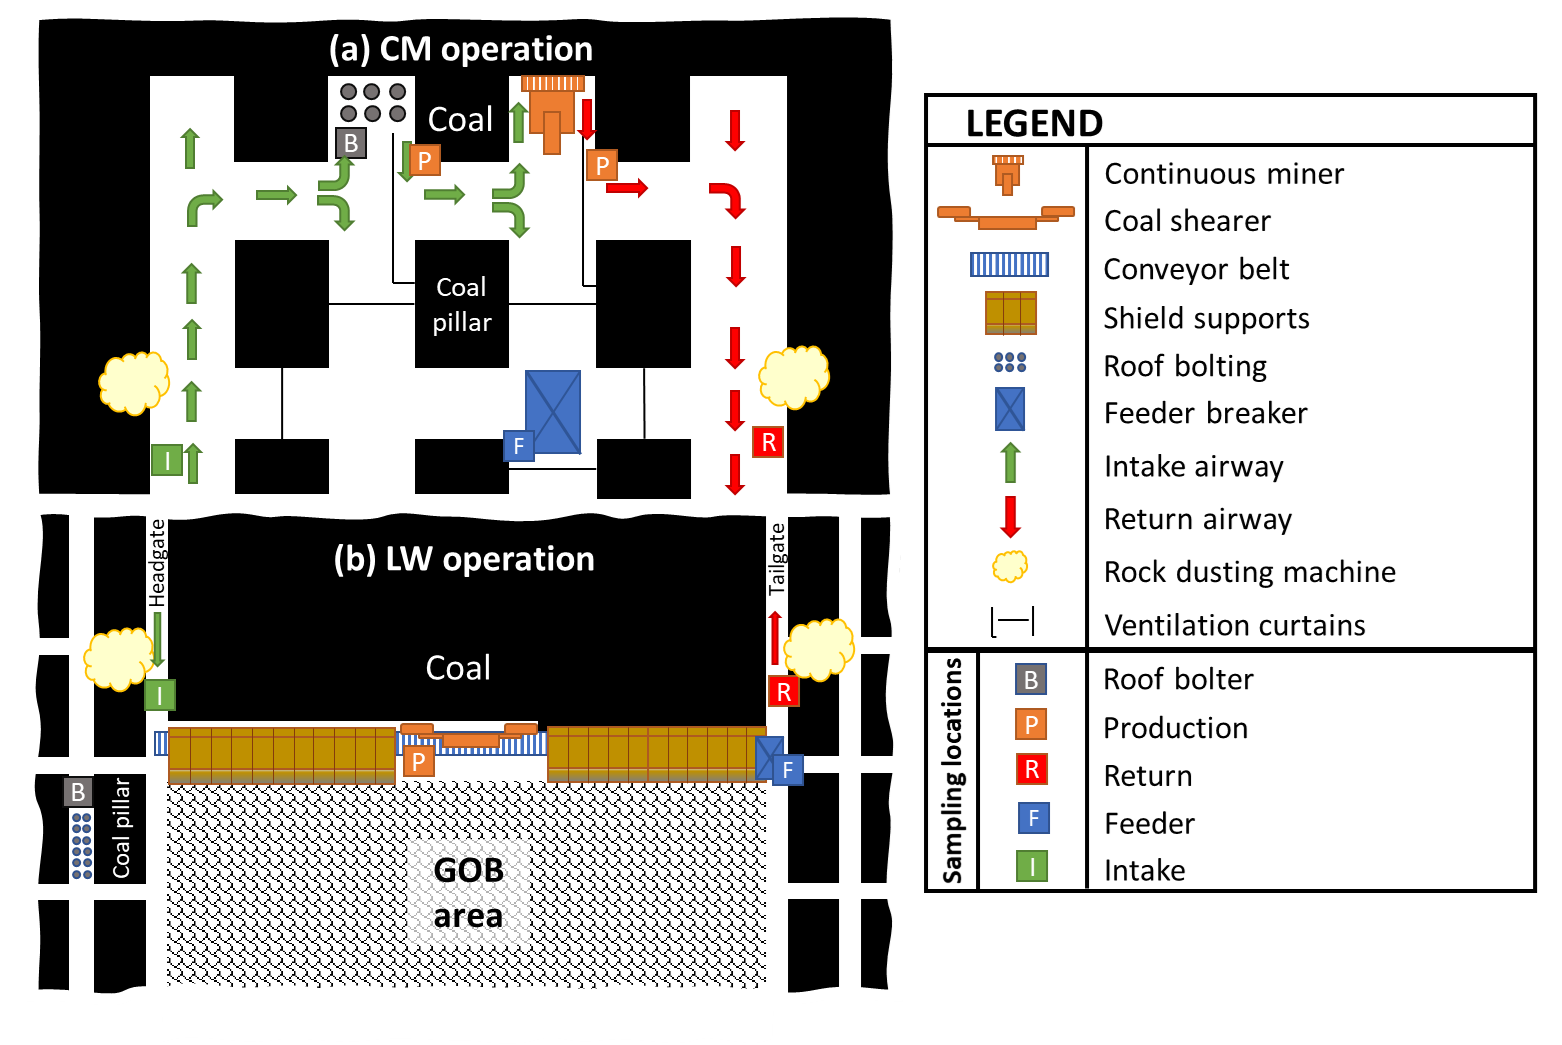

Supplement: s1 [file s1 › Figure S1.png]

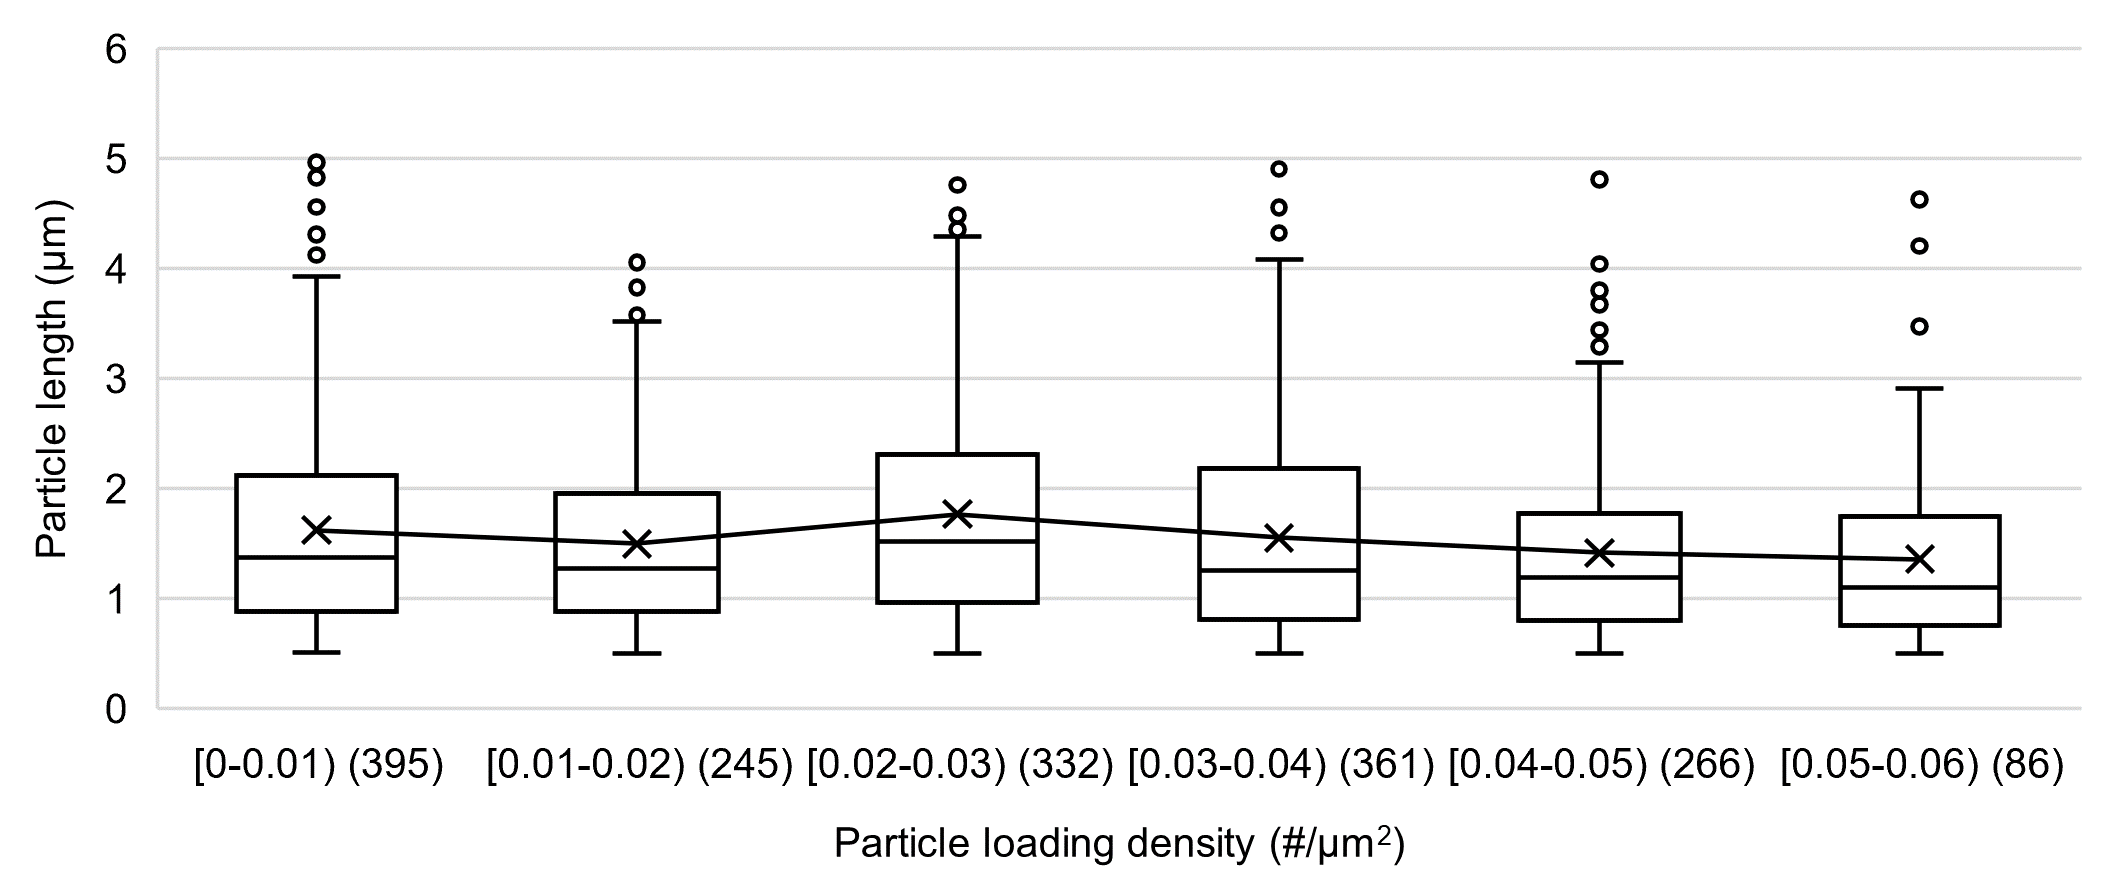

Supplement: s1 [file s1 › Figure S2.png]

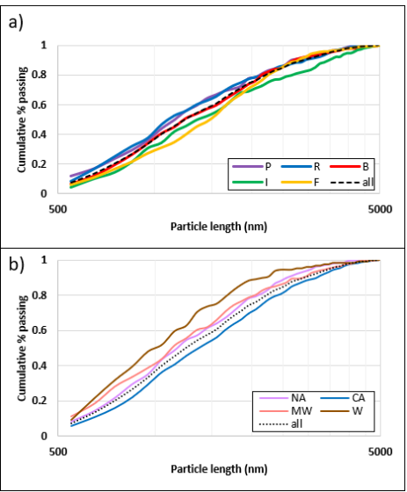

Supplement: s1 [file s1 › Figure S3.png]

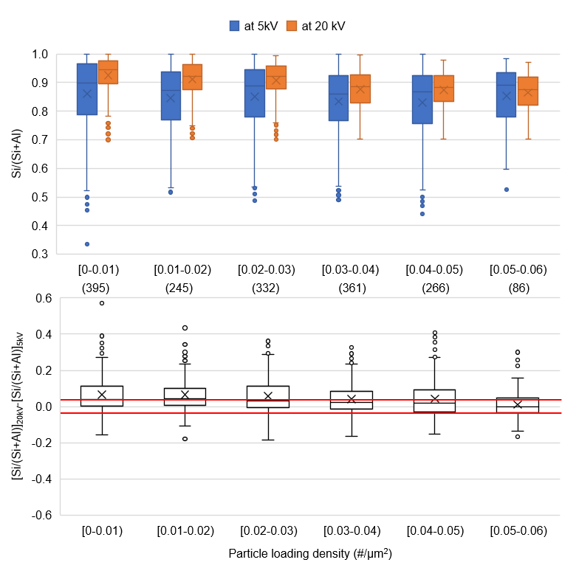

Supplement: s1 [file s1 › Figure S4.png]

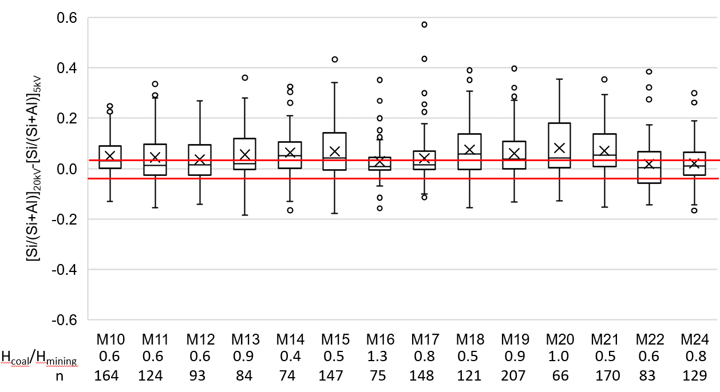

Supplement: s1 [file s1 › Figure S5.png]

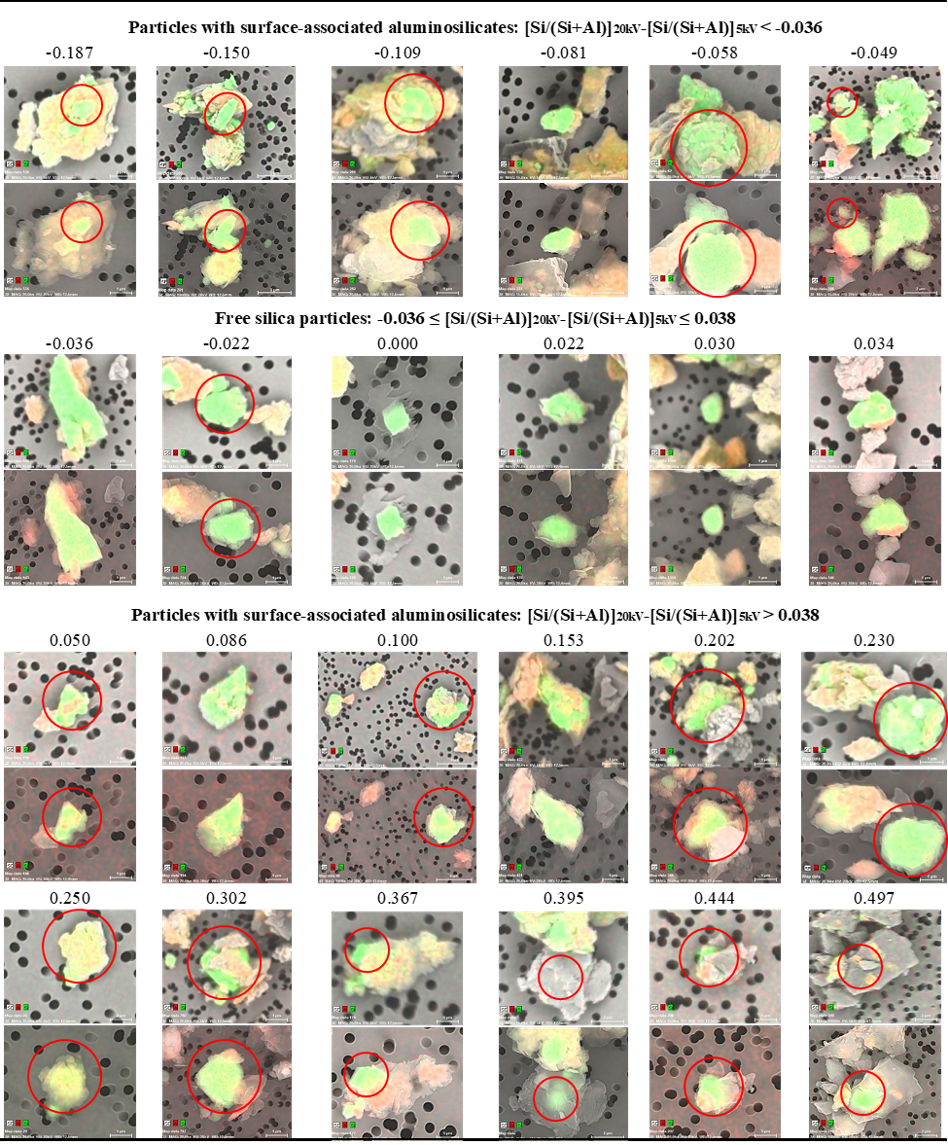

Supplement: s1 [file s1 › Figure S6.png]
